# Supplementary material for: Improving continuity of patient care across sectors: study protocol of the process evaluation of a quasi-experimental multi-centre study regarding an admission and discharge model in Germany (VESPEERA)
Source: PubMed Central journal article supplement — BMJ Open. 2019 Nov 12;9(11):e031245. doi: 10.1136/bmjopen-2019-031245 (PMC6858220; doi:10.1136/bmjopen-2019-031245), 2019-11-12
Supplement: bmjopen-2019-031245.draft_revisions.pdf [file bmjopen-2019-031245.draft_revisions.pdf]

# BMJ Open

BMJ Open is committed to open peer review. As part of this commitment we make the peer review history of every article we publish publicly available.

When an article is published we post the peer reviewers' comments and the authors' responses online. We also post the versions of the paper that were used during peer review. These are the versions that the peer review comments apply to.

The versions of the paper that follow are the versions that were submitted during the peer review process. They are not the versions of record or the final published versions. They should not be cited or distributed as the published version of this manuscript.

BMJ Open is an open access journal and the full, final, typeset and author-corrected version of record of the manuscript is available on our site with no access controls, subscription charges or pay-per-view fees (<http://bmjopen.bmj.com>).

If you have any questions on BMJ Open's open peer review process please email [info.bmjopen@bmj.com](mailto:info.bmjopen@bmj.com)

# BMJ Open

## Improving continuity of patient care across sectors: Study protocol of the process evaluation of a quasi-experimental multi-centre study regarding an admission and discharge model in Germany (VESPEERA)

|                               |                                                                                                                                                                                                                                                                                                                                                                                                                                                                                                                                                                                                                                                                   |
|-------------------------------|-------------------------------------------------------------------------------------------------------------------------------------------------------------------------------------------------------------------------------------------------------------------------------------------------------------------------------------------------------------------------------------------------------------------------------------------------------------------------------------------------------------------------------------------------------------------------------------------------------------------------------------------------------------------|
| Journal:                      | <i>BMJ Open</i>                                                                                                                                                                                                                                                                                                                                                                                                                                                                                                                                                                                                                                                   |
| Manuscript ID                 | bmjopen-2019-031245                                                                                                                                                                                                                                                                                                                                                                                                                                                                                                                                                                                                                                               |
| Article Type:                 | Protocol                                                                                                                                                                                                                                                                                                                                                                                                                                                                                                                                                                                                                                                          |
| Date Submitted by the Author: | 24-Apr-2019                                                                                                                                                                                                                                                                                                                                                                                                                                                                                                                                                                                                                                                       |
| Complete List of Authors:     | Forstner, Johanna; Heidelberg University, Department of General Practice and Health Services Research<br>Kunz, Aline; Heidelberg University, Department of General Practice and Health Services Research<br>Straßner, Cornelia; Heidelberg University, Department of General Practice and Health Services Research<br>Uhlmann, Lorenz; Heidelberg University, Institute of Medical Biometry and Informatics<br>Kuemmel, Stephanie; aQua-Institut GmbH<br>Szecsenyi, Joachim; Heidelberg University, Department of General Practice and Health Services Research<br>Wensing, M; Heidelberg University, Department of General Practice and Health Services Research |
| Keywords:                     | process evaluation, CFIR, determinants for implementation, admission management, discharge management, continuity of care                                                                                                                                                                                                                                                                                                                                                                                                                                                                                                                                         |
|                               |                                                                                                                                                                                                                                                                                                                                                                                                                                                                                                                                                                                                                                                                   |

SCHOLARONE™  
Manuscripts

1  
2  
3 **Title:** Improving continuity of patient care across sectors: Study protocol of the  
4 process evaluation of a quasi-experimental multi-centre study regarding an  
5 admission and discharge model in Germany (VESPEERA)  
6  
7  
8

9  
10  
11 **Authors:** Forstner, Johanna; Kunz, Aline; Straßner, Cornelia; Uhlmann, Lorenz;  
12  
13 Kuemmel, Stephanie; Szecsenyi, Joachim; Wensing, Michel  
14

15  
16 **Word count** (from Background to Ethics, data protection and security, and  
17 dissemination; excluding title page, abstract, references, figures and tables): 3,937  
18  
19  
20  
21

22  
23  
24  
25 Johanna Forstner

26  
27 University Hospital Heidelberg, Department for General Practice and Health Services  
28  
29 Research

30  
31  
32  
33 Heidelberg, Germany  
34

35  
36  
37 Aline Kunz

38  
39 University Hospital Heidelberg, Department for General Practice and Health Services  
40  
41 Research

42  
43  
44  
45 Heidelberg, Germany  
46

47  
48  
49 Dr. med. Cornelia Straßner

50  
51  
52 University Hospital Heidelberg, Department for General Practice and Health Services  
53  
54 Research

55  
56  
57  
58 Heidelberg, Germany  
59  
60

1  
2  
3 Dr. Lorenz Uhlmann  
4

5  
6 University Hospital Heidelberg, Institute for Medical Biometry and Informatics, Dept.  
7  
8 for Medical Biometry  
9

10  
11 Heidelberg, Germany  
12

13  
14 Kuemmel, Stephanie  
15

16  
17 aQua-Institute  
18

19  
20 Göttingen, Germany  
21  
22

23  
24  
25 Prof. Dr. med. Dipl. Soz. Joachim Szecsenyi  
26

27  
28 University Hospital Heidelberg, Department for General Practice and Health Services  
29  
30 Research  
31

32  
33 Heidelberg, Germany  
34

35  
36  
37 Prof. Dr. Michel Wensing  
38

39  
40 University Hospital Heidelberg, Department for General Practice and Health Services  
41  
42 Research  
43

44  
45 Heidelberg, Germany  
46  
47

48  
49  
50 Corresponding author:  
51

52  
53 Johanna Forstner  
54

55  
56 University Hospital Heidelberg, Department for General Practice and Health Services  
57  
58 Research  
59  
60

1  
2  
3 Im Neuenheimer Feld 130.3, Marsilius Arkaden, Turm West, D-69120 Heidelberg  
4  
5

6 Phone: 06221 / 56 35559  
7  
8

9 Fax: 06221 / 56 1972  
10  
11

12 E-Mail: johanna.forstner@med.uni-heidelberg.de  
13  
14  
15  
16  
17  
18  
19  
20  
21  
22  
23  
24

## 25 **Abstract**

26  
27  
28 **Introduction:** Hospital stays are critical events as they often disrupt continuity of care.  
29  
30 The aim of the VESPEERA programme is the development, implementation and  
31 evaluation of a structured admission and discharge program in general practices  
32 and hospitals. This process evaluation aims to describe and explore the  
33 implementation of the VESPEERA programme. The evaluation concerns the  
34 intervention fidelity, reach in targeted populations, perceived effects, working  
35 mechanisms, feasibility, determinants for implementation, including contextual  
36 factors, and associations with the outcomes evaluation.  
37  
38  
39  
40  
41  
42  
43  
44

45  
46  
47 **Methods and analysis:** The process evaluation is linked to the VESPEERA outcomes  
48 evaluation, which has a quasi-experimental multi-centre design with four study arms  
49 and is conducted in hospitals and general practices Germany. The VESPEERA  
50 programme comprises several components: an assessment before admission, an  
51 admission letter, a telephonic discharge conversation between hospital and general  
52 practice before discharge, discharge information for patients, structured planning of  
53  
54  
55  
56  
57  
58  
59  
60

1  
2  
3 follow-up care after discharge in the general practice and a telephone monitoring  
4  
5 for patients with a risk of rehospitalisation.  
6  
7

8 The process evaluation has a mixed-methods design, incorporating interviews  
9  
10 (patients and both care providers who do and do not participate in the VESPEERA  
11  
12 programme, total n=75), questionnaires (patients and care providers who participate  
13  
14 in the VESPEERA programme, total n=475), implementation plans of hospitals, data  
15  
16 documented in general practices, claims-based data and hospital process data.  
17  
18

19  
20 Data analysis is descriptive and explorative. Qualitative data will be transcribed and  
21  
22 analysed using framework analysis based on the Consolidated Framework for  
23  
24 Implementation Research. Associations between the outcomes of the program and  
25  
26 measures in the process evaluation will be explored in regression models.  
27  
28

29  
30 **Ethics and dissemination:** Ethics approval has been obtained by the ethics  
31  
32 committee of the Medical Faculty Heidelberg prior to the start of the study (S-  
33  
34 352/2018). Results will be disseminated through a final report to the funding agency,  
35  
36 articles in peer-reviewed journals, and conferences.  
37  
38

39  
40 **Trial Registration:** DRKS00015183 on DRKS / Universal Trial Number (UTN): U1111-1218-  
41  
42 0992  
43  
44

45 **Key Words:** process evaluation, implementation science, intervention fidelity, CFIR,  
46  
47 barriers, facilitators, admission management, discharge management, continuity of  
48  
49 care  
50  
51

### 52 **Strengths and limitations of this study:**

- 53  
54  
55  
56 • The process evaluation will help to interpret the findings of the outcomes  
57  
58 evaluation of a hospital admission and discharge program.  
59  
60

- The perspectives of a broad range of stakeholders are considered, including care providers, patients and other stakeholders.
- This mixed-methods process evaluation addresses a broad range of aspects, which are associated with implementation and outcomes of the VESPEERA programme.
- Linkage of interview and questionnaire data with data sources of the outcome evaluation is not possible at individual level.

For peer review only

## Introduction

Insufficient communication between hospitals and physicians in the outpatient sector may jeopardize the recovery process, lead to avoidable rehospitalisations[1, 2] and induce adverse events.[3] These outcomes also affect health related patient satisfaction and healthcare costs.[4] The legislator in Germany responded to this care problem by obligating hospitals to offer discharge management measures to all patients (*"Rahmenvertrag über ein Entlassmanagement beim Übergang in die Versorgung nach Krankenhausbehandlung nach § 39 Abs. 1 S.9 SGB V"*). The VESPEERA programme aims to support the implementation of this regulation. It develops, implements and evaluates a structured hospital admission and discharge program between general practices and hospitals to avoid interruptions in the admission and discharge process. The interventions and the outcomes evaluation are described elsewhere.[5] Subsequently, we first summarize the patient-directed interventions in the VESPEERA programme, the implementation strategies, and the outcomes evaluation. Then we elaborate on the process evaluation in the remaining of this paper.

### VESPEERA programme

Legislation in Germany is focused on hospital discharge and does not address admission management. The VESPEERA programme supports the implementation of structured discharge management and adds admission management procedures, further outpatient care after discharge and some other interventions. The VESPEERA programme consists of several intervention components before, during and after a hospital stay in general practices and hospitals concerning admission and discharge. Before hospital admission, the general practitioner (GP) will conduct an assessment with the patient in order to generate an admission letter for the hospital, providing



1  
2  
3 medical and social information on the patient. Intervention components in the  
4 hospital include a telephonic discharge conversation for defined high-risk patients  
5 between the hospital and the general practice as well as a patient discharge  
6 information. After discharge, another assessment will be conducted in the general  
7 practice to facilitate planning of follow-up treatment and to identify patients with an  
8 increased risk for rehospitalisation based on the HOSPITAL Score (a score to  
9 determine risk of 30-day rehospitalisation[6]). These patients will be enrolled in a  
10 three-month telephone monitoring. Table 1 gives an overview on the intervention  
11 components and study arms.  
12  
13  
14  
15  
16  
17  
18  
19  
20  
21  
22  
23

24 Table 1: **VESPEERA intervention components for all study arms**

| <b>Interventions</b> |                                                                                                                                                         | <i>Study arm</i><br>1: <b>planned</b><br>admission<br>into a<br><b>participatin</b><br><b>g</b> hospital | <i>Study arm</i><br>2:<br><b>planned</b><br>admission<br>into a <b>non-</b><br><b>participatin</b><br><b>g</b> hospital | <i>Study arm</i><br>3:<br>unplanned<br>admission<br>into a<br><b>participatin</b><br><b>g</b> hospital | <i>Study arm</i><br>4:<br>unplanned<br>admission<br>into a <b>non-</b><br><b>participatin</b><br><b>g</b> hospital | <i>Study arm</i><br>5: <b>control</b><br><b>group</b> , not<br>participati<br>ng in<br>VESPEERA |
|----------------------|---------------------------------------------------------------------------------------------------------------------------------------------------------|----------------------------------------------------------------------------------------------------------|-------------------------------------------------------------------------------------------------------------------------|--------------------------------------------------------------------------------------------------------|--------------------------------------------------------------------------------------------------------------------|-------------------------------------------------------------------------------------------------|
| General practice     | <b>Interventions in the general practice before admission:</b><br>(A) assessment for admission<br>(B) admission letter and patient brochure             | X                                                                                                        | X                                                                                                                       |                                                                                                        |                                                                                                                    |                                                                                                 |
| Hospital             | <b>Interventions in the hospital:</b><br>(C) telephonic discharge conversation<br>(D) determination of HOSPITAL Score and patient discharge information | X                                                                                                        |                                                                                                                         |                                                                                                        |                                                                                                                    |                                                                                                 |

|                  |                                                                                                                             |   |   |   |   |  |
|------------------|-----------------------------------------------------------------------------------------------------------------------------|---|---|---|---|--|
| General practice | <b>Interventions in the general practice after discharge:</b>                                                               |   |   |   |   |  |
|                  | (E) assessment for planning of follow-up treatment<br>(F) telephone monitoring, depending on the risk for rehospitalisation | X | X | X | X |  |

### Implementation strategies

Several strategies were applied to support the implementation of structured hospital admission and discharge management. The strategies are named according to the ERIC compilation by Powell et al.[7] and are reported using the recommendations by Proctor et al.[8] are as following:

First, the record system is changed by enhancing the PraCMan-Cockpit, software that is routinely used in Baden-Wuerttemberg within the PracMan case management programme.[9] The resulting CareCockpit includes the additional VESPEERA module, which assists general practices with organising patient information, conducting the assessments and care planning, generating the admission letter and other documents, and administrating telephone calls within the telephone monitoring. The CareCockpit is software that works independently from the practice information system and is used by the Care Assistant in General Practice (*Versorgungsassistentin in der Hausarztpraxis*, VERAH) and the GP. Furthermore, the CareCockpit works as an electronical case report form for data analysis within the outcomes evaluation.

Second, train-the-trainer strategies are used in order to instruct GPs and VERAHs in software utilisation and study processes. Trainers are teams of two (GP and VERAH)

1  
2  
3 who are experienced in training the PraCMan-Cockpit and who were instructed in  
4 handling the CareCockpit by the study central office. GPs and VERAHs who are  
5 interested in participating in the VESPEERA programme sign up for a one-time 2.5  
6 hour training. GPs and VERAHs learn the handling of the software in a role-play  
7 format.  
8  
9  
10  
11  
12  
13  
14

15 Third, in order to support GPs and VERAHs with implementation of all intervention  
16 components, educational materials are developed. Investigator site files are  
17 provided after participation in the training by the study central office. Investigator  
18 site files contain instructions and background information on the following: obtaining  
19 informed consent by patients, installation of the CareCockpit-software, an overview  
20 on frequently asked questions concerning the handling of the software, conduction  
21 of the intervention components, and conduction of the patient survey. Furthermore,  
22 general practices are continuously provided with instructional video tutorials on  
23 handling the software by the study central office. Along with the trainings,  
24 educational materials are expected to increase intervention fidelity.  
25  
26  
27  
28  
29  
30  
31  
32  
33  
34  
35  
36  
37

38 Fourth, formal commitments are obtained by participating hospitals. Adaptability is  
39 promoted in order to facilitate the integration of study components into clinical  
40 processes. Therefore, each hospital will provide information on how they will ensure  
41 the identification of study patients, the use of the admission letter, the execution of  
42 the telephonic discharge conversation, the dissemination of the patient discharge  
43 information and the transmission data to calculate the HOSPITAL Score. These formal  
44 commitments are obtained within four weeks after signing the participation  
45 agreement. Thereby, intervention fidelity as well as acceptance and attractiveness  
46 of the VESPEERA programme are expected to increase.  
47  
48  
49  
50  
51  
52  
53  
54  
55  
56  
57  
58  
59  
60

1  
2  
3 Fifth, both participating general practices and hospitals are provided ongoing  
4 consultation with the study central office and other consortium partners to support  
5 implementation. General practices and hospitals are repeatedly called by  
6 employees of the study central office and asked for the status of implementation  
7 and any problems that arise within the implementation process. General practices  
8 are offered refreshers on topics of the training, such as the procedure for obtaining  
9 informed consent by patients, handling of the software, and instruction of the  
10 intervention components. Thereby, intervention fidelity is expected to increase.  
11  
12  
13  
14  
15  
16  
17  
18  
19  
20  
21

22 Sixth, consensus discussions with representatives of all stakeholders, thus physicians,  
23 GPs, patients, sickness funds and researchers, have been conducted. All intervention  
24 components were thoroughly discussed in the developmental period concerning  
25 the relevance of items, wording of items and design of documents, such as the  
26 patient discharge information. By involving users in the development of the  
27 intervention, acceptance and attractiveness of the programme are expected to  
28 increase.  
29  
30  
31  
32  
33  
34  
35  
36  
37

38 Sixth, hospitals and general practices are provided feedback in the form of three  
39 benchmarking reports in September 2018, June 2019 and December 2019. The  
40 feedback reports are based on structured, quantified data-sources (claims data,  
41 patient data from the CareCockpit, and patient survey data), and are aggregated  
42 on a hospital or general practice level. These will be discussed in three moderated  
43 feedback meetings during the intervention period with care providers, where options  
44 for potential improvement will be developed. Feedback meetings are planned for  
45 September 2018, September 2019 and March 2020. Feedback meetings are  
46 moderated by the study central office with support by the other project partners.  
47 Care providers will have an active role in the meetings in a workshop format and  
48  
49  
50  
51  
52  
53  
54  
55  
56  
57  
58  
59  
60

1  
2  
3 report their perspective and experiences. Audit and feedback is a strategy to  
4 improve professional practice, which has mixed and overall moderate impacts on  
5 professional performance.[10, 11] In this context, feedback provided is expected to  
6 enhance intervention fidelity.  
7  
8  
9  
10

11  
12 Additionally, hospitals and general practices will receive fee-for-service for  
13 conducting patient-related care services as well as lump sum reimbursement for  
14 study organisation and participation in workshops and feedback meetings. General  
15 practices can invoice the care services as part of their usual invoice process, which is  
16 carried out at the end of each quarter year. Hospitals invoice the sickness fund  
17 'Allgemeine Ortskrankenkasse' (AOK) Baden-Wurttemberg at the end of each  
18 quarter year. Lump sums are paid after participating in the feedback meetings. Fee-  
19 for-service gives an incentive to provide the different interventions components and  
20 thereby is expected to increase intervention fidelity.[12]  
21  
22  
23  
24  
25  
26  
27  
28  
29  
30  
31  
32

### 33 **VESPEERA outcomes evaluation**

34  
35 The VESPEERA programme is "expected to reduce the number of avoidable  
36 rehospitalisations and emergency care contacts, to improve patient safety and  
37 patient involvement, to reduce overuse, underuse and misuse of health care, to  
38 improve the continuity of care and to improve interprofessional and cross-sectoral  
39 communication between patients, hospitals, general practices and the sickness fund  
40 'Allgemeine Ortskrankenkasse (AOK) Baden-Wurttemberg'".[5]  
41  
42  
43  
44  
45  
46  
47  
48  
49  
50

51 The intervention is evaluated in a quantitative outcomes evaluation with a quasi-  
52 experimental design. The primary outcome is the number of rehospitalisations due to  
53 the same indication (three-digit ICD-10-GM code) within a time frame of three  
54 months (90 days) to the outpatient sector. The following indicators have been  
55 defined as secondary outcomes: rehospitalisation due to the same indication within  
56  
57  
58  
59  
60

1  
2  
3 30 days; hospitalisations due to ambulatory care-sensitive conditions; delayed  
4 prescription of medication and medical products/ devices and referral to other  
5 health practitioner/s after discharge; utilisation of emergency or rescue services  
6 within three months; average care cost per year and patient participating in the  
7 VESPEERA programme.  
8  
9  
10  
11  
12

13  
14  
15 Using AOK claims data, patient data from the CareCockpit, and data collected in a  
16 questionnaire-based patient survey, a difference-in-difference model is applied for  
17 the primary analysis. The change of the primary outcome (before vs. after the  
18 intervention) of each intervention group will be pairwise compared to the control  
19 group. A detailed description of the outcomes evaluation can be found in the  
20 corresponding study protocol.[5]  
21  
22  
23  
24  
25  
26  
27  
28

### 29 **VESPEERA process evaluation**

30  
31  
32 The VESPEERA programme is a complex intervention which intends to impact on a  
33 range of outcomes. The impact on outcomes depends not only on the effectiveness  
34 of planned interventions, but also on the degree of implementation of these  
35 interventions, the reach in relevant healthcare providers and patient populations,  
36 and the moderating impacts of the organisational and societal context in which the  
37 interventions are applied. As described by the Medical Research Council, complex  
38 interventions are characterized by multiple, mutually interacting intervention  
39 components; multiple targeted groups of individuals and organisations; multiple  
40 outcomes and mediating factors; high impact of the organisational and societal  
41 context on outcomes; and a "degree of flexibility or tailoring of the  
42 interventions".[13] These features largely apply to VESPEERA. A large number of  
43 interventions are applied; various organisations in different care sectors are involved,  
44 each with structural conditions specific to the sector (e.g. remuneration systems). The  
45  
46  
47  
48  
49  
50  
51  
52  
53  
54  
55  
56  
57  
58  
59  
60

1  
2  
3 effects of the interventions cover a range of domains.[5] Furthermore, hospitals are  
4 involved in the implementation within their organisation to tailor it to their local  
5 processes and structures.  
6  
7  
8

9  
10 We planned a process evaluation to provide insight into how well the intervention  
11 was implemented, why it did or did not work (i.e. did or did not have an effect on  
12 outcomes),[13-15] what context factors had an influence on the implementation  
13 and outcomes, and thereby allow to improve "transferability of potentially effective  
14 programs to other settings".[16] Investigation of implementation outcomes such as  
15 reach (whether the targeted population participated as intended/ the degree to  
16 which the targeted population participated) or intervention fidelity (whether the  
17 intervention was delivered as planned) can help to better understand the results of  
18 the outcomes evaluation.[17]  
19  
20  
21  
22  
23  
24  
25  
26  
27  
28  
29

### 30 31 Objectives

32  
33  
34 The multifaceted VESPEERA programme contains a selection of recommended  
35 practices in patient care as well as a set of strategies to implement these. This  
36 process evaluation aims to examine the intervention fidelity, reach in targeted  
37 populations, perceived effects, working mechanisms, feasibility, and determinants for  
38 implementation, including contextual factors, as well as associations with the  
39 outcomes evaluation, so that programme outcomes can be better interpreted. The  
40 specific research questions are listed in Table 2.  
41  
42  
43  
44  
45  
46  
47  
48  
49

50  
51 Figure 1 shows the hypothesized working mechanisms of the VESPEERA programme  
52 and the primary areas of interest of the outcomes and the process evaluation,  
53 respectively. The planned procedures for the process evaluation will be described in  
54 detail below.  
55  
56  
57  
58  
59  
60

1  
2  
3 < Insert Figure 1 here >  
4  
5  
6  
7  
8  
9  
10  
11  
12  
13  
14  
15  
16  
17  
18  
19  
20  
21  
22  
23  
24  
25  
26  
27  
28  
29  
30  
31  
32  
33  
34  
35  
36  
37  
38  
39  
40  
41  
42  
43  
44  
45  
46  
47  
48  
49  
50  
51  
52  
53  
54  
55  
56  
57  
58  
59  
60

For peer review only



Table 2: **Research question, outcomes and data sources**

| Research Question                                                                                                                                                                                                                                                                                                                              | Outcomes / Indicators                                                                                                                                                                                                                                                                                                                                                                                                                                                                                                                                                          | Data sources                                                                                |
|------------------------------------------------------------------------------------------------------------------------------------------------------------------------------------------------------------------------------------------------------------------------------------------------------------------------------------------------|--------------------------------------------------------------------------------------------------------------------------------------------------------------------------------------------------------------------------------------------------------------------------------------------------------------------------------------------------------------------------------------------------------------------------------------------------------------------------------------------------------------------------------------------------------------------------------|---------------------------------------------------------------------------------------------|
| <p>REACH AND INTERVENTION FIDELITY</p> <p>Was the intervention implemented as planned ("intervention fidelity") in targeted populations ("reach")?</p>                                                                                                                                                                                         | <p>Proportion and description of patients who participated in VESPEERA compared to all targeted persons who meet the inclusion criteria</p>                                                                                                                                                                                                                                                                                                                                                                                                                                    | <p>Data set consisting of CareCockpit-data, claims-based data and hospital process data</p> |
| <p>To what extent have the planned components been offered to care providers and patients?</p> <p>To what extent have these been utilised by care providers and patients?</p> <p>What was the adherence concerning the recommended practices of hospital admission and discharge.</p> <p>Has the targeted patient population been reached?</p> | <p>Proportion of persons enrolled in the general practitioner centered-care programme (HZV) who</p> <ul style="list-style-type: none"> <li>-have been admitted to a participating hospital by a participating practice,</li> <li>-for whom a new patient account has been created in the Care Cockpit and</li> <li>-for whom a complete admission letter including a medication plan was generated and was given to the patient to take along,</li> </ul> <p>compared to all participating HZV-insured persons in participating practices with planned hospital admissions</p> | <p>Data set consisting of CareCockpit-data, claims-based data and hospital process data</p> |

|                                                                                                           |                                                                                                                                                                                                                                                                                                                         |                                                                                                          |
|-----------------------------------------------------------------------------------------------------------|-------------------------------------------------------------------------------------------------------------------------------------------------------------------------------------------------------------------------------------------------------------------------------------------------------------------------|----------------------------------------------------------------------------------------------------------|
| <p>1<br/>2<br/>3<br/>4<br/>5<br/>6<br/>7<br/>8<br/>9<br/>10<br/>11<br/>12<br/>13<br/>14<br/>15<br/>16</p> | <p>Proportion of participating patients who<br/>-have been discharged from a participating hospital to their<br/>GP<br/>-for whom at the time of discharge the HOSPITAL Score has<br/>been determined<br/>compared to all participating patients who have been<br/>discharged from a participating hospital</p>         | <p>Data set consisting of<br/>CareCockpit-data, claims-<br/>based data and hospital<br/>process data</p> |
| <p>17<br/>18<br/>19<br/>20<br/>21<br/>22<br/>23<br/>24<br/>25<br/>26<br/>27</p>                           | <p>Proportion of participating patients for whom the assessment<br/>for planning of follow-up treatment has been conducted<br/>compared to all participating patients</p>                                                                                                                                               | <p>Data set consisting of<br/>CareCockpit-data, claims-<br/>based data and hospital<br/>process data</p> |
| <p>28<br/>29<br/>30<br/>31<br/>32<br/>33<br/>34<br/>35<br/>36<br/>37<br/>38</p>                           | <p>Proportion of participating patients who have been enrolled in<br/>the follow-up telephone monitoring due to an intermediate or<br/>high risk for rehospitalisation and for whom at least two phone<br/>calls have been conducted within the given timeframe of<br/>three months, per all participating patients</p> | <p>Data set consisting of<br/>CareCockpit-data, claims-<br/>based data and hospital<br/>process data</p> |

1  
2  
3  
4  
5  
6  
7  
8  
9  
10  
11  
12  
13  
14  
15  
16  
17  
18  
19  
20  
21  
22  
23  
24  
25  
26  
27  
28  
29  
30  
31  
32  
33  
34  
35  
36  
37  
38  
39  
40  
41  
42  
43  
44  
45  
46

|                                                                                                                                                                                                                                            |                                                                                                                                                        |                                                                                                                                         |
|--------------------------------------------------------------------------------------------------------------------------------------------------------------------------------------------------------------------------------------------|--------------------------------------------------------------------------------------------------------------------------------------------------------|-----------------------------------------------------------------------------------------------------------------------------------------|
|                                                                                                                                                                                                                                            | <p>The degree to which the intervention components in hospitals have been implemented and offered as compared to the intention</p>                     | <p>Hospital process data survey;<br/>Hospital Implementation plans;<br/>Questionnaires: staff from participating hospitals</p>          |
| <p>PERCEIVED EFFECTS</p> <p>Which results, from the view point of care providers and patients, were:</p> <p>Achieved as intended?</p> <p>Not achieved although intended?</p> <p>Achieved although not intended (positive or negative)?</p> | <p>Open-ended question</p> <p>As support:</p> <p>2a) and 2b): name outcomes of the outcome evaluation</p> <p>2c): name domains of possible results</p> | <p>Qualitative survey: all participating care providers, patients</p> <p>Questionnaires: all participating care providers, patients</p> |
| <p>WORKING MECHANISMS</p> <p>Which components and aspects of the intervention programme contributed to achieving the results from the view point of care providers?</p>                                                                    | <p>open-ended question</p> <p>as support:</p> <p>name intervention components (4-8 max., only those concerning the person being interviewed)</p>       | <p>qualitative survey: all participating care providers</p> <p>Questionnaires: all participating care providers</p>                     |

|                                                                                                                                                                   |                                                                                                                                                                                                                                                                                     |                                                                                                    |
|-------------------------------------------------------------------------------------------------------------------------------------------------------------------|-------------------------------------------------------------------------------------------------------------------------------------------------------------------------------------------------------------------------------------------------------------------------------------|----------------------------------------------------------------------------------------------------|
|                                                                                                                                                                   |                                                                                                                                                                                                                                                                                     |                                                                                                    |
| FEASIBILITY                                                                                                                                                       | Open-ended questions                                                                                                                                                                                                                                                                | qualitative survey: all participating care providers                                               |
| What were acceptability and attractiveness of the programme from the point of view of care providers?                                                             |                                                                                                                                                                                                                                                                                     | Questionnaires: all participating care providers                                                   |
| CONTEXTUAL FACTORS                                                                                                                                                | Open-ended question in qualitative survey, structured questions in questionnaires                                                                                                                                                                                                   | qualitative survey: all participating care providers                                               |
| a) What are determinants for implementing the program?                                                                                                            | As support:                                                                                                                                                                                                                                                                         |                                                                                                    |
| b) Which contextual factors on system, hospital and practice level influenced the adoption of intervention components and outcomes of the program?                | 5a): name domains, especially concerning behavioral factors (such as knowledge, attitude, self-efficacy, routine, desire/ will, skills/ capability; using the CFIR[18]<br>5b): name domains of contextual factors using frameworks (to be chosen when designing the questionnaires) | Questionnaires: all participating care providers                                                   |
| c) Which practices concerning admission and discharge management have been implemented in non-participating hospitals during the intervention period (for example | 5c) :Open-ended question<br>As support:<br>Name components of admission and discharge management                                                                                                                                                                                    | qualitative survey: non-participating hospitals, management staff from non-participating hospitals |

1  
2  
3  
4  
5  
6  
7  
8  
9  
10  
11  
12  
13  
14  
15  
16  
17  
18  
19  
20  
21  
22  
23  
24  
25  
26  
27  
28  
29  
30  
31  
32  
33  
34  
35  
36  
37  
38  
39  
40  
41  
42  
43  
44  
45  
46

|                                                                                                                                                                       |  |                                                                                             |
|-----------------------------------------------------------------------------------------------------------------------------------------------------------------------|--|---------------------------------------------------------------------------------------------|
| <p>in consequence of the "Rahmenvertrag über ein Entlassmanagement nach Krankenhausbehandlung")?</p>                                                                  |  |                                                                                             |
| <p>DOSE-RESPONSE ASSOCIATIONS<br/>Which associations exist between the outcomes (as disclosed by the outcomes evaluation) and findings of the process evaluation?</p> |  | <p>Data set consisting of CareCockpit-data, claims-based data and hospital process data</p> |

For peer review only

## Methods of process evaluation

### Study design

The process evaluation has an observational mixed-methods design, incorporating qualitative data from interviews and implementation plans with a description of the implementation in participating hospitals as well as quantitative data from questionnaires that are filled in for each patient in hospital, surveys and data collected through the CareCockpit software in general practices. This process evaluation is part of the VESPEERA study that lasts from October 2017 until March 2021. The planned time frame for the process evaluation started in July 2018; evaluations will be complete by the end of October 2020.

### Study setting

The VESPEERA programme is implemented in 25 hospital departments and 115 general practices in a defined region in southern Germany. The process evaluation is carried out by the Department of General Practice and Health Services Research at the Heidelberg University Hospital.

### Eligibility criteria

Patients who take part and gave their informed consent to the VESPEERA study participation and outcomes evaluation can participate in the process evaluation. GPs and VERAHs who participate in the VESPEERA study can participate in the process evaluation. Hospital staff from participating hospitals has to work in one of the departments selected for VESPEERA implementation OR have to be involved in the implementation process of the VESPEERA intervention components on a higher hierarchical level. Physicians, nursing staff and hospital management from non-participating hospitals as well as GPs and VERAHs from non-participating general

1  
2 practices are included if they can provide insight into admission and discharge  
3  
4 processes.  
5  
6

7 Above that, all participants have to be 18 years and older, have written and spoken  
8 German language skills and have to be able to give their informed consent into  
9 study participation in the process evaluation. Persons who are unable to give their  
10 consent are excluded from study participation.  
11  
12  
13  
14  
15

### 16 17 Outcomes of the process evaluation

18  
19 Table 2 gives an overview on the research questions phrased, outcomes and data  
20 sources used.  
21  
22  
23  
24

### 25 26 Data sources

27  
28 The process evaluation uses data from a mix of sources.  
29  
30  
31

### 32 *Interviews*

33  
34 Qualitative interviews will be conducted with nursing staff, physicians and  
35 management staff from participating and non-participating hospitals, GPs and  
36 VERAHs from participating and non-participating general practices as well as  
37 participating patients after hospital stay. The interview guide addresses the  
38 intervention fidelity, intended and unplanned effects, and factors influencing  
39 implementation (barriers, facilitators, contextual factors) as well as acceptance and  
40 attractiveness of the intervention.  
41  
42  
43  
44  
45  
46  
47  
48  
49

### 50 51 *Questionnaires*

52  
53 Additionally, quantitative data result from structured surveys with participating  
54 general practitioners, VERAHs, physicians, nursing staff, management staff, and  
55 patients after a hospital stay. The questionnaire will be designed based on the results  
56  
57  
58  
59  
60

1  
2 of the qualitative interviews as well as other studies on process evaluations and will  
3 be piloted before use. This pseudonymised questionnaire will not contain any data  
4 that allows identification of participants' identity. Concepts addressed in the  
5 questionnaires will be, amongst others, reach (see Objective 1), unintended effects  
6 (see Objective 2), added value (see Objective 3), and barriers and facilitators for  
7 implementation (see Objective 4).  
8  
9  
10  
11  
12  
13  
14  
15  
16  
17  
18  
19  
20  
21  
22

### 23 *Hospital Process Data Survey*

24  
25  
26 As part of the VESPEERA programme, hospitals are asked to collect the HOSPITAL  
27 Score for patients to determine their risk of rehospitalisation. This questionnaire is  
28 expanded by questions used for the process evaluation. These include  
29 sociodemographic questions and questions on processes that are part of the study  
30 interventions that are implemented within hospitals (identification of VESPEERA  
31 patients, utilisation of the VESPEERA admission letter, telephonic discharge  
32 conversation with the general practice).  
33  
34  
35  
36  
37  
38  
39  
40  
41  
42

### 43 *Hospital Implementation Plans*

44  
45 In order to facilitate the integration of study components into clinical processes,  
46 different approaches are suitable for different hospitals. Therefore, each hospital will  
47 provide information on how they will ensure the identification of study patients, the  
48 use of the admission letter, the execution of the telephonic discharge conversation,  
49 the dissemination of the patient discharge information and determination of the  
50 HOSPITAL Score.  
51  
52  
53  
54  
55  
56  
57  
58  
59  
60

### *Patient data*



1  
2 For the outcomes evaluation, patient data from the CareCockpit is linked with  
3  
4 claims-based data from AOK Baden-Wurttemberg and data from the hospital  
5  
6 process data survey. This data set will be provided for the process evaluation. These  
7  
8 data provide information on the study arm that the patient belongs to as well as  
9  
10 patient characteristics, the pseudonym generated in the CareCockpit for data  
11  
12 linkage, diagnoses, the medical question for admission, information on previous  
13  
14 antibiotic prescriptions, living situation, long-term care related items (such as scales  
15  
16 for activities of daily living and instrumental activities of daily living), medical  
17  
18 information (such as pain, wounds, alarming symptoms for medical emergencies,  
19  
20 PHQ-2 instrument for mental disorders screening), compliance to medicinal therapy,  
21  
22 the items of the HOSPITAL Score as well as process data (provision of information to  
23  
24 patients, information on whether any follow-up care has been initiated and  
25  
26 successfully executed).

### 31 32 Sample size

33  
34  
35 The sample for the qualitative study is planned to reach saturation of data; the  
36  
37 planned numbers are expected to be sufficient. The study sample for interviews on a  
38  
39 hospital level consists of management staff, physicians and nursing staff and will be  
40  
41 stratified by region and hospital size. On a practice level, GPs, VERAHs and patients,  
42  
43 will be recruited from participating practices, stratified by practice size, region and  
44  
45 gender. Additionally, staff from non-participating hospitals and general practices will  
46  
47 be interviewed. This is important as interventions on a systems level can influence the  
48  
49 effects of the evaluated care model. Table 3 gives an overview on the planned  
50  
51 sample size for interviews.  
52  
53  
54  
55

56 **Table 3: Planned sample size for interviews**

|  |  |
|--|--|
|  |  |
|--|--|

|                                            |                       | Planned number of participants<br>(n) |
|--------------------------------------------|-----------------------|---------------------------------------|
| <b>Hospitals</b>                           | Nursing Staff         | 10                                    |
|                                            | Management Staff      | 10                                    |
|                                            | Physicians            | 10                                    |
| <b>Non-participating hospitals</b>         | Nursing Staff         | 5                                     |
|                                            | Management Staff      | 5                                     |
|                                            | Physicians            | 5                                     |
| <b>General Practices</b>                   | General Practitioners | 10                                    |
|                                            | VERAHs                | 10                                    |
| <b>Non-participating general practices</b> | General Practitioners | 10                                    |
|                                            | VERAHs                | 10                                    |
| <b>Patients</b>                            | Patient               | 10                                    |
| <b>Total number</b>                        |                       | <b>75</b>                             |

The sample for the quantitative survey study comprises of all participating practices and hospitals (full study population) and a sample of n=200 patients for explorative data analysis (see Table 4). The sample size of patients was restricted out of feasibility reasons.

Table 4: Planned sample size for questionnaires

|                          |                       | Planned number of participants<br>(n) |
|--------------------------|-----------------------|---------------------------------------|
| <b>Hospitals</b>         | Nursing Staff         | 25                                    |
|                          | Management Staff      | 25                                    |
|                          | Physicians            | 25                                    |
| <b>General Practices</b> | General Practitioners | 100                                   |
|                          | VERAHs                | 100                                   |
| <b>Patients</b>          | Patient               | 200                                   |
| <b>Total number</b>      |                       | <b>475</b>                            |

## Recruitment

Within the process evaluation, participants will be recruited for interviews and written surveys.

### *Recruitment for qualitative interviews*

Personnel from non-participating hospitals will be recruited by contacting the hospital management. A purposeful sample of hospitals will be selected, amongst others based on region, top-level versus basic care and previous interest to participate in VESPEERA. GPs and VERAHs from non-participating general practices will be recruited based on a list of all GPs who participate in GP-based care outside of the intervention region. A purposeful sample will be selected based on region, practice size and gender. Eligible patients will be contacted by the general practices, as they are not known to the study central office.

By using a response coupon eligible interview participants from all stakeholder groups can declare their interest in participating in an interview. They will then be contacted by the study central office, be provided with an information letter and the written consent form.

### *Recruitment for the survey*

Personnel from participating hospitals will be recruited by the contact person at the hospitals. The contact persons will be provided with information letters, written informed consent forms and the paper-based questionnaires and will be asked to hand it out to eligible personnel as defined by the study central office. All participating general practices will be sent the information letters, informed consent forms and paper-based questionnaires for GPs and VERAHs and will be asked to fill it in. Patients will be recruited by the general practices, as they are not known to the

1  
2 study central office. GPs will be provided with information letters, informed consent  
3  
4 forms and paper-based questionnaires and will be asked to hand it out to eligible  
5  
6 patients.  
7  
8  
9

## 10 Data collection and management

### 11 *Interviews*

12  
13  
14  
15 Interviews will be conducted as face-to-face or telephone interviews by researchers  
16  
17 of the study central office. Interviews will last 30 minutes maximum and will be  
18  
19 conducted using a semi-structured interview guide. In exceptional cases, for  
20  
21 instance if problems within the recruitment process arise, written qualitative interviews  
22  
23 consisting of open-end questions might be used. All interviews will be audio-  
24  
25 recorded, transcribed verbatim and stored on a secured server of the study central  
26  
27 office. Transcripts will contain pseudonymized data only.  
28  
29  
30  
31

### 32 *Questionnaires*

33  
34  
35 Paper-based questionnaires are mailed to physicians, VERAHs, nursing staff and  
36  
37 management staff from participating hospitals, GPs and patients. The filled in  
38  
39 questionnaires will be sent by mail using an enclosed post-paid envelope to the  
40  
41 study central office, where they will be scanned and digitally stored on a secured  
42  
43 server. Reminders for data collection of both interviews and questionnaires will be  
44  
45 sent out to all potential participants one to two times via fax, mail or post.  
46  
47  
48  
49

### 50 *Hospital Process Data Survey*

51  
52  
53 Hospitals fill in the hospital process data survey on the conduction all intervention  
54  
55 components for each case at the time of the patients' discharge, using the form  
56  
57 they use to collect data for the HOSPITAL score used in the VESPEERA study.  
58  
59  
60

1  
2 The hospitals can either integrate the questionnaire into their hospital information  
3 system as an electronic questionnaire (transfer to the aQua-Institute via secure file  
4 transfer protocol (SFTP) servers) or fill in paper-based questionnaires that are sent to  
5 the aQua-Institute via mail using enclosed post-paid envelopes.  
6  
7  
8  
9

### 10 11 12 *Hospital Implementation Plans*

13  
14  
15 Participating hospitals will hand in a description of their individual implementation  
16 plan to the study central office.  
17  
18

### 19 20 21 *Patient data*

22  
23 During the intervention period, patient data from the CareCockpit is continuously  
24 collected for the purpose of data analysis. Data from the CareCockpit is transferred  
25 along with claims-based data each quarter year.  
26  
27  
28  
29

### 30 31 Data analysis

32  
33 Data analysis for the process evaluation is descriptive and explorative. Qualitative  
34 data will be transcribed according to established standards and will be analysed  
35 with regard to the research questions with framework analysis using the software  
36 MAXQDA.[19] The framework used for data analysis is the Consolidated Framework  
37 for Implementation Research (CFIR).[18] The CFIR was chosen as it is a  
38 comprehensive framework that takes into account many of the aspects that need to  
39 be considered when evaluating the implementation of a complex intervention in  
40 healthcare organisations.  
41  
42  
43  
44  
45  
46  
47  
48  
49  
50

51  
52  
53 Quantitative survey data and the indicators for the intervention fidelity will be  
54 analysed descriptively. Correlations between the outcomes of the process  
55 evaluation and the outcomes evaluation will further be analysed using multilevel  
56 regression models.  
57  
58  
59  
60

## Patient and public involvement

Patients were actively involved in the conduction of all intervention components, as described in the 'Implementation Strategies' section. With the 'Gesundheitstreffpunkt Mannheim e.V.' as consortium partner, an organisation representing patient interests is involved in all stages of the study (funding application, design of the study, conduction of intervention components, interpretation of results, dissemination of results).

## **Discussion**

This process evaluation aims to provide insight into the implementation process of the VESPEERA programme in the participating general practices and hospital departments as well as the determinants influencing the degree of implementation. The results will contribute to adjusting the VESPEERA programme after the completion of all evaluations for a possible implementation into routine care. By relying on the GP as a gatekeeper to further health care and by proposing communication structures, the VESPEERA programme is expected to improve continuity of care.

Continuity of care is a complex concept with no clear definition.[20] However, recurring components of continuity of care include the first contact with a primary care provider, i.e. gatekeeping, information continuity ("the capacity of that information to travel with the patient and throughout the health system, between providers and over time"[21]) and longitudinal care provider continuity.[2, 20] By improving continuity of care patient outcomes are supposedly improved. In a systematic review, Huntley et al. found that continuity of care, i.e. seeing the same GP, reduced utilisation of emergency departments and emergency hospital admissions.[22] Furthermore, in another systematic review by an Loenen et al. the authors showed that aspects of primary care such as a gatekeeping role and

1  
2 provider continuity are associated with a lower risk of avoidable hospitalisations due  
3  
4 to ambulant care sensitive conditions.[2]  
5

6  
7 Huntley et al.[22] und van Loenen et al.[2] included mostly observational studies in  
8  
9 their reviews on the effects of organisational features of primary care on  
10  
11 hospitalisations and emergency care use. With a quasi-experimental approach and  
12  
13 a thorough process evaluation, the VESPEERA programme is expected to contribute  
14  
15 to the literature on the effects of continuity of care and care coordination on several  
16  
17 patient outcomes.  
18  
19

20  
21 Within this process evaluation, perspectives of a broad range of stakeholders are  
22  
23 considered. Furthermore, interviews allow for gaining in-depth understanding of  
24  
25 experiences with the VESPEERA programme and communication processes, whereas  
26  
27 questionnaires allow for a higher sample size. Thereby, this serves to understand the  
28  
29 broad implementation of a complex intervention.  
30  
31

32  
33 However, no linkage between interview and questionnaire data with data sources of  
34  
35 the outcome evaluation is intended. The intervention fidelity and barriers and  
36  
37 facilitators to implementing the intervention therefore cannot be linked with patient-  
38  
39 individual outcomes.  
40  
41

## 42 43 44 45 46 47 **Ethics, data protection and security, and dissemination** 48

49  
50 The study protocol has been submitted to and approved by the ethics committee of  
51  
52 the Medical Faculty Heidelberg. A data protection concept is part of the VESPEERA  
53  
54 contractual agreement between consortium partners and has been approved by a  
55  
56 data security officer. The regulations of the European General Data Protection  
57  
58 Regulation are met.  
59  
60

1  
2  
3  
4  
5  
6  
7  
8  
9  
10  
11  
12  
13  
14  
15  
16  
17  
18  
19  
20  
21  
22  
23  
24  
25  
26  
27  
28  
29  
30  
31  
32  
33  
34  
35  
36  
37  
38  
39  
40  
41  
42  
43  
44  
45  
46  
47  
48  
49  
50  
51  
52  
53  
54  
55  
56  
57  
58  
59  
60

Dissemination of the results of this study is planned through the final report to the funding agency, articles in peer-reviewed journals as well as relevant national, and if relevant, international conferences.

**Trial Status:** The study protocol on hand is the protocol version 1.1 from June 18th 2018. Recruitment for interviews started on September 3<sup>rd</sup> 2018 and will approx. be completed by the end of May 2019.

### List of Abbreviations

|         |                                                                                             |
|---------|---------------------------------------------------------------------------------------------|
| AOK     | Allgemeine Ortskrankenkasse, large German sickness fund                                     |
| CFIR    | Consolidated Framework for Implementation Research                                          |
| GP      | general practitioner                                                                        |
| HZV     | general practitioner centered-care programme (Hausarztzentrierte Versorgung)                |
| PraCMan | general practice-based case management programme (Hausarztpraxis-basiertes Case Management) |
| SFTP    | Secure File Transfer Protocol                                                               |
| VERAH   | Care Assistant in General Practice (Versorgungsassistentin in der Hausarztpraxis)           |



1  
2 VESPEERA Improving continuity of patient care across sectors: A quasi-  
3  
4 experimental multi-centre study regarding an admission and discharge  
5  
6 model in Germany  
7  
8  
9  
10  
11  
12

### 13 **Declarations**

14  
15  
16 Ethics approval and consent to participate: The study protocol has been submitted  
17  
18 to and approved by the ethics committee of the Medical Faculty Heidelberg prior to  
19  
20 the start of the study (S-352/2018).  
21  
22

23  
24 Patient consent for publication: Not applicable.  
25  
26

27 Data sharing: Access to data and materials can be requested from the data owners.  
28  
29

30 Competing interests: The authors declare that they have no competing interest.  
31  
32 Joachim Szecsenyi holds stocks of the aQua-Institute.  
33  
34

35 Funding: This work was supported by the Federal Joint Committee (G-BA), Innovation  
36  
37 Fund, grant number 01NVF17024. The funder had no role in the design of the study  
38  
39 and will not be involved in its execution, data analysis and dissemination of results.  
40  
41

42 Authors contributions: JF, AK and MW drafted the original manuscript. All authors  
43  
44 contributed to the design of the study, data collection and read and approved the  
45  
46 final manuscript.  
47  
48

49 Acknowledgements: Furthermore, we thank all consortium partners of the VESPEERA-  
50  
51 study- 'AOK Baden-Württemberg' for overall project organisation and consortium  
52  
53 leadership, 'University Hospital Heidelberg, Department for General Practice and  
54  
55 Health Services Research' for project coordination, execution of the study and all  
56  
57 study central office related issues, 'aQua-Institute' for data management and  
58  
59  
60

1  
2 preparation and execution of the patient survey, 'HÄVG Hausärztliche  
3 Vertragsgemeinschaft AG' for organisation of train-the-trainer events, 'University  
4 Hospital Heidelberg, Institute for Medical Biometry and Informatics, Dept. for Medical  
5 Biometry for statistical expertise and statistical analyses and 'Gesundheitstreffpunkt  
6 Mannheim e.V.' for involvement of patients in the development of intervention  
7 components. Moreover, we thank participating hospitals, general practices and  
8 patients. We would like to thank Annika Baldauf and Marion Kiel for organisation and  
9 support of all study central office-related issues.  
10  
11  
12  
13  
14  
15  
16  
17  
18  
19

20  
21 Additional files: SPIRIT Checklist, World Health Organization Trial Registration Data Set,  
22

23 Figure 1  
24  
25  
26  
27  
28  
29

## 30 Literature

- 31  
32  
33  
34 1. Hesselink G, Schoonhoven L, Barach P, et al.: Improving patient handovers from hospital to  
35 primary care: A systematic review. *Ann Intern Med* 2012, 157(6):417-428.
- 36 2. van Loenen T, van den Berg MJ, Westert GP, Faber MJ: Organizational aspects of primary  
37 care related to avoidable hospitalization: a systematic review. *Fam Pract* 2014, 31(5):502-  
38 516.
- 39 3. Forster AJ, Murff HJ, Peterson JF, Gandhi TK, Bates DW: The Incidence and Severity of  
40 Adverse Events Affecting Patients after Discharge from the Hospital. *Ann Intern Med* 2003,  
41 138(3):161-167.
- 42 4. Goncalves-Bradley DC, Lannin NA, Clemson LM, Cameron ID, Shepperd S: Discharge planning  
43 from hospital. *Cochrane Database Syst Rev* 2016(1):CD000313.
- 44 5. Forstner J, Strassner C, Kunz A, Uhlmann L, Freund T, Peters-Klimm F, Wensing M, Kuemmel  
45 S, El-Kurd N, Rueck R *et al*: Improving continuity of patient care across sectors: study protocol  
46 of a quasi-experimental multi-centre study regarding an admission and discharge model in  
47 Germany (VESPEERA). *BMC Health Serv Res* 2019, 19:206.
- 48 6. Donze JD, Williams MV, Robinson EJ, Zimlichman E, Aujesky D, Vasilevskis EE, Kripalani S,  
49 Metlay JP, Wallington T, Fletcher GS *et al*: International Validity of the HOSPITAL Score to  
50 Predict 30-Day Potentially Avoidable Hospital Readmissions. *JAMA Intern Med* 2016,  
51 176(4):496-502.
- 52 7. Powell BJ, Waltz TJ, Chinman MJ, Damschroder LJ, Smith JL, Matthieu MM, Proctor EK,  
53 Kirchner JE: A refined compilation of implementation strategies: results from the Expert  
54 Recommendations for Implementing Change (ERIC) project. *Implementation Science* 2015,  
55 10(1):21.
- 56 8. Proctor EK, Powell BJ, McMillen JC: Implementation strategies: recommendations for  
57 specifying and reporting. *Implementation Science* 2013, 8(1):139.  
58  
59  
60

- 1
  - 2
  - 3
  - 4
  - 5
  - 6
  - 7
  - 8
  - 9
  - 10
  - 11
  - 12
  - 13
  - 14
  - 15
  - 16
  - 17
  - 18
  - 19
  - 20
  - 21
  - 22
  - 23
  - 24
  - 25
  - 26
  - 27
  - 28
  - 29
  - 30
  - 31
  - 32
  - 33
  - 34
  - 35
  - 36
  - 37
  - 38
  - 39
  - 40
  - 41
  - 42
  - 43
  - 44
  - 45
  - 46
  - 47
  - 48
  - 49
  - 50
  - 51
  - 52
  - 53
  - 54
  - 55
  - 56
  - 57
  - 58
  - 59
  - 60
9. Freund T, Peters-Klimm F, Boyd CM, et al.: Medical assistant–based care management for high-risk patients in small primary care practices: A cluster randomized clinical trial. *Ann Intern Med* 2016, 164(5):323-330.
10. Ivers NM, Sales A, Colquhoun H, Michie S, Foy R, Francis JJ, Grimshaw JM: No more ‘business as usual’ with audit and feedback interventions: towards an agenda for a reinvented intervention. *Implementation Science* 2014, 9(1):14.
11. Ivers N, Jamtvedt G, Flottorp S, Young JM, Odgaard-Jensen J, French SD, O'Brien MA, Johansen M, Grimshaw J, Oxman AD: Audit and feedback: effects on professional practice and healthcare outcomes. *Cochrane Database of Systematic Reviews* 2012(6).
12. Flodgren G, Eccles MP, Shepperd S, Scott A, Parmelli E, Beyer FR: An overview of reviews evaluating the effectiveness of financial incentives in changing healthcare professional behaviours and patient outcomes. *Cochrane Database of Systematic Reviews* 2011(7).
13. Craig P, Dieppe P, Macintyre S, Michie S, Nazareth I, Petticrew M: Developing and evaluating complex interventions: the new Medical Research Council guidance. *BMJ* 2008, 337:a1655.
14. Oakley A, Strange V, Bonell C, Allen E, Stephenson J, Team RS: Process evaluation in randomised controlled trials of complex interventions. *BMJ* 2006, 332(7538):413-416.
15. Dobson D, Cook TJ: Avoiding type III error in program evaluation. *Eval Program Plann* 1980, 3(4):269-276.
16. Bradley F, Wiles R, Kinmonth AL, Mant D, Gantley M: Development and evaluation of complex interventions in health services research: case study of the Southampton heart integrated care project (SHIP). 1999, 318(7185):711-715.
17. Linnan; L, Steckler A: An Overview. In: *Process Evaluation for Public Health Interventions and Research*. edn. Edited by Linnan; L, Steckler A. San Francisco, CA: Jossey-Bass; 2002.
18. Damschroder LJ, Aron DC, Keith RE, Kirsh SR, Alexander JA, Lowery JC: Fostering implementation of health services research findings into practice: a consolidated framework for advancing implementation science. *Implementation Science* 2009, 4(1):50.
19. Mayring P: Qualitative Inhaltsanalyse. Grundlagen und Techniken, vol. 11. Weinheim, Basel: Beltz; 2016.
20. Salisbury C, Sampson F, Ridd M, Montgomery AA: How should continuity of care in primary health care be assessed? *The British journal of general practice : the journal of the Royal College of General Practitioners* 2009, 59(561):e134-e141.
21. Gardner K, Banfield M, McRae I, Gillespie J, Yen L: Improving coordination through information continuity: a framework for translational research. *BMC Health Serv Res* 2014, 14:590-590.
22. Huntley A, Lasserson D, Wye L, Morris R, Checkland K, England H, Salisbury C, Purdy S: Which features of primary care affect unscheduled secondary care use? A systematic review. *BMJ Open* 2014, 4(5):e004746.

## Figure Legends

Figure 1: **Logic model of the working mechanisms in the VESPEERA programme**

1  
2  
3  
4  
5  
6  
7  
8  
9  
10  
11  
12  
13  
14  
15  
16  
17  
18  
19  
20  
21  
22  
23  
24  
25  
26  
27  
28  
29  
30  
31  
32  
33  
34  
35  
36  
37  
38  
39  
40  
41  
42  
43  
44  
45  
46  
47  
48  
49  
50  
51  
52  
53  
54  
55  
56  
57  
58  
59  
60

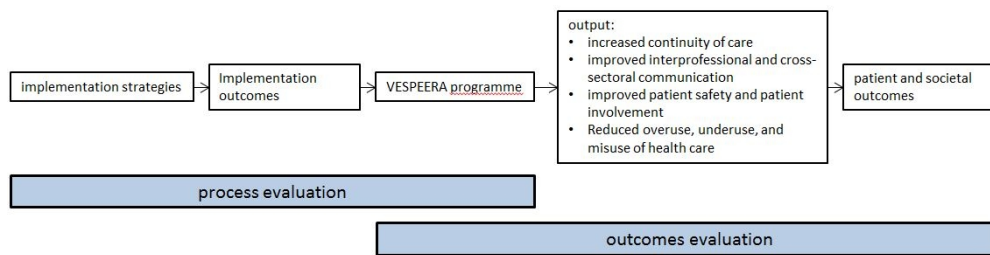

Figure 1: Logic model of the working mechanisms in the VESPEERA programme

302x77mm (96 x 96 DPI)

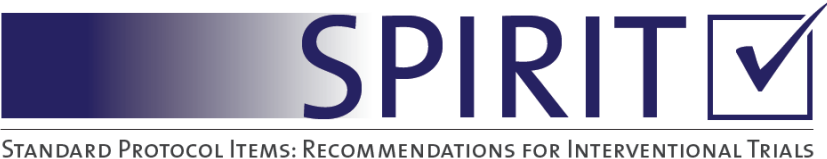

1  
2  
3  
4  
5  
6  
7  
8  
9  
10  
11  
12  
13  
14  
15  
16  
17  
18  
19  
20  
21  
22  
23  
24  
25  
26  
27  
28  
29  
30  
31  
32  
33  
34  
35  
36  
37  
38  
39  
40  
41  
42  
43  
44  
45  
46

SPIRIT 2013 Checklist: Recommended items to address in a clinical trial protocol and related documents\*

| Section/item                      | Item No | Description                                                                                                                                                                                                                                                                              | Addressed on page number |
|-----------------------------------|---------|------------------------------------------------------------------------------------------------------------------------------------------------------------------------------------------------------------------------------------------------------------------------------------------|--------------------------|
| <b>Administrative information</b> |         |                                                                                                                                                                                                                                                                                          |                          |
| Title                             | 1       | Descriptive title identifying the study design, population, interventions, and, if applicable, trial acronym                                                                                                                                                                             | 1 (Title)                |
| Trial registration                | 2a      | Trial identifier and registry name. If not yet registered, name of intended registry                                                                                                                                                                                                     | 4 (Trial Registration)   |
|                                   | 2b      | All items from the World Health Organization Trial Registration Data Set                                                                                                                                                                                                                 | Additional files         |
| Protocol version                  | 3       | Date and version identifier                                                                                                                                                                                                                                                              | 24 (Trial Status)        |
| Funding                           | 4       | Sources and types of financial, material, and other support                                                                                                                                                                                                                              | 26 (Declarations)        |
| Roles and responsibilities        | 5a      | Names, affiliations, and roles of protocol contributors                                                                                                                                                                                                                                  | 1-2, 26 (Declarations)   |
|                                   | 5b      | Name and contact information for the trial sponsor                                                                                                                                                                                                                                       | 26 (Declarations)        |
|                                   | 5c      | Role of study sponsor and funders, if any, in study design; collection, management, analysis, and interpretation of data; writing of the report; and the decision to submit the report for publication, including whether they will have ultimate authority over any of these activities | 26 (Declarations)        |

|    |                                                           |     |                                                                                                                                                                                                                                                                  |                                                       |
|----|-----------------------------------------------------------|-----|------------------------------------------------------------------------------------------------------------------------------------------------------------------------------------------------------------------------------------------------------------------|-------------------------------------------------------|
| 1  |                                                           | 5d  | Composition, roles, and responsibilities of the coordinating centre, steering committee, endpoint adjudication committee, data management team, and other individuals or groups overseeing the trial, if applicable (see Item 21a for data monitoring committee) | 26 (Declarations)                                     |
| 2  |                                                           |     |                                                                                                                                                                                                                                                                  |                                                       |
| 3  |                                                           |     |                                                                                                                                                                                                                                                                  |                                                       |
| 4  |                                                           |     |                                                                                                                                                                                                                                                                  |                                                       |
| 5  |                                                           |     |                                                                                                                                                                                                                                                                  |                                                       |
| 6  |                                                           |     |                                                                                                                                                                                                                                                                  |                                                       |
| 7  |                                                           |     |                                                                                                                                                                                                                                                                  |                                                       |
| 8  |                                                           |     |                                                                                                                                                                                                                                                                  |                                                       |
| 9  | <b>Introduction</b>                                       |     |                                                                                                                                                                                                                                                                  |                                                       |
| 10 |                                                           |     |                                                                                                                                                                                                                                                                  |                                                       |
| 11 | Background and rationale                                  | 6a  | Description of research question and justification for undertaking the trial, including summary of relevant studies (published and unpublished) examining benefits and harms for each intervention                                                               | 5-6 (Background), 10-11 (VESPEERA process evaluation) |
| 12 |                                                           |     |                                                                                                                                                                                                                                                                  |                                                       |
| 13 |                                                           |     |                                                                                                                                                                                                                                                                  |                                                       |
| 14 |                                                           |     |                                                                                                                                                                                                                                                                  |                                                       |
| 15 |                                                           |     |                                                                                                                                                                                                                                                                  |                                                       |
| 16 |                                                           |     |                                                                                                                                                                                                                                                                  |                                                       |
| 17 |                                                           |     |                                                                                                                                                                                                                                                                  |                                                       |
| 18 |                                                           | 6b  | Explanation for choice of comparators                                                                                                                                                                                                                            | n.a.                                                  |
| 19 | Objectives                                                | 7   | Specific objectives or hypotheses                                                                                                                                                                                                                                | 11 (Objectives)                                       |
| 20 |                                                           |     |                                                                                                                                                                                                                                                                  |                                                       |
| 21 | Trial design                                              | 8   | Description of trial design including type of trial (eg, parallel group, crossover, factorial, single group), allocation ratio, and framework (eg, superiority, equivalence, noninferiority, exploratory)                                                        | 16 (Methods)                                          |
| 22 |                                                           |     |                                                                                                                                                                                                                                                                  |                                                       |
| 23 |                                                           |     |                                                                                                                                                                                                                                                                  |                                                       |
| 24 |                                                           |     |                                                                                                                                                                                                                                                                  |                                                       |
| 25 |                                                           |     |                                                                                                                                                                                                                                                                  |                                                       |
| 26 | <b>Methods: Participants, interventions, and outcomes</b> |     |                                                                                                                                                                                                                                                                  |                                                       |
| 27 |                                                           |     |                                                                                                                                                                                                                                                                  |                                                       |
| 28 | Study setting                                             | 9   | Description of study settings (eg, community clinic, academic hospital) and list of countries where data will be collected. Reference to where list of study sites can be obtained                                                                               | 10 (Study setting)                                    |
| 29 |                                                           |     |                                                                                                                                                                                                                                                                  |                                                       |
| 30 |                                                           |     |                                                                                                                                                                                                                                                                  |                                                       |
| 31 | Eligibility criteria                                      | 10  | Inclusion and exclusion criteria for participants. If applicable, eligibility criteria for study centres and individuals who will perform the interventions (eg, surgeons, psychotherapists)                                                                     | 16-17 (Study setting/ eligibility criteria)           |
| 32 |                                                           |     |                                                                                                                                                                                                                                                                  |                                                       |
| 33 |                                                           |     |                                                                                                                                                                                                                                                                  |                                                       |
| 34 |                                                           |     |                                                                                                                                                                                                                                                                  |                                                       |
| 35 |                                                           |     |                                                                                                                                                                                                                                                                  |                                                       |
| 36 | Interventions                                             | 11a | Interventions for each group with sufficient detail to allow replication, including how and when they will be administered                                                                                                                                       | n.a.                                                  |
| 37 |                                                           |     |                                                                                                                                                                                                                                                                  |                                                       |
| 38 |                                                           |     |                                                                                                                                                                                                                                                                  |                                                       |
| 39 |                                                           | 11b | Criteria for discontinuing or modifying allocated interventions for a given trial participant (eg, drug dose change in response to harms, participant request, or improving/worsening disease)                                                                   | n.a.                                                  |
| 40 |                                                           |     |                                                                                                                                                                                                                                                                  |                                                       |
| 41 |                                                           |     |                                                                                                                                                                                                                                                                  |                                                       |
| 42 |                                                           |     |                                                                                                                                                                                                                                                                  |                                                       |
| 43 |                                                           |     |                                                                                                                                                                                                                                                                  |                                                       |
| 44 |                                                           |     |                                                                                                                                                                                                                                                                  |                                                       |
| 45 |                                                           |     |                                                                                                                                                                                                                                                                  |                                                       |
| 46 |                                                           |     |                                                                                                                                                                                                                                                                  |                                                       |

|    |                      |     |                                                                                                                                                                                                                                                                                                                                                                                |                     |
|----|----------------------|-----|--------------------------------------------------------------------------------------------------------------------------------------------------------------------------------------------------------------------------------------------------------------------------------------------------------------------------------------------------------------------------------|---------------------|
| 1  |                      | 11c | Strategies to improve adherence to intervention protocols, and any procedures for monitoring adherence (eg, drug tablet return, laboratory tests)                                                                                                                                                                                                                              | n.a.                |
| 2  |                      |     |                                                                                                                                                                                                                                                                                                                                                                                |                     |
| 3  |                      |     |                                                                                                                                                                                                                                                                                                                                                                                |                     |
| 4  |                      | 11d | Relevant concomitant care and interventions that are permitted or prohibited during the trial                                                                                                                                                                                                                                                                                  | n.a.                |
| 5  |                      |     |                                                                                                                                                                                                                                                                                                                                                                                |                     |
| 6  | Outcomes             | 12  | Primary, secondary, and other outcomes, including the specific measurement variable (eg, systolic blood pressure), analysis metric (eg, change from baseline, final value, time to event), method of aggregation (eg, median, proportion), and time point for each outcome. Explanation of the clinical relevance of chosen efficacy and harm outcomes is strongly recommended | 12-15 (Table 2)     |
| 7  |                      |     |                                                                                                                                                                                                                                                                                                                                                                                |                     |
| 8  |                      |     |                                                                                                                                                                                                                                                                                                                                                                                |                     |
| 9  |                      |     |                                                                                                                                                                                                                                                                                                                                                                                |                     |
| 10 |                      |     |                                                                                                                                                                                                                                                                                                                                                                                |                     |
| 11 | Participant timeline | 13  | Time schedule of enrolment, interventions (including any run-ins and washouts), assessments, and visits for participants. A schematic diagram is highly recommended (see Figure)                                                                                                                                                                                               | 16 (Study design)   |
| 12 |                      |     |                                                                                                                                                                                                                                                                                                                                                                                |                     |
| 13 |                      |     |                                                                                                                                                                                                                                                                                                                                                                                |                     |
| 14 |                      |     |                                                                                                                                                                                                                                                                                                                                                                                |                     |
| 15 | Sample size          | 14  | Estimated number of participants needed to achieve study objectives and how it was determined, including clinical and statistical assumptions supporting any sample size calculations                                                                                                                                                                                          | 19-20 (Sample Size) |
| 16 |                      |     |                                                                                                                                                                                                                                                                                                                                                                                |                     |
| 17 |                      |     |                                                                                                                                                                                                                                                                                                                                                                                |                     |
| 18 | Recruitment          | 15  | 20-21                                                                                                                                                                                                                                                                                                                                                                          | 16-17(Recruitment)  |
| 19 |                      |     |                                                                                                                                                                                                                                                                                                                                                                                |                     |
| 20 |                      |     |                                                                                                                                                                                                                                                                                                                                                                                |                     |
| 21 |                      |     |                                                                                                                                                                                                                                                                                                                                                                                |                     |

**Methods: Assignment of interventions (for controlled trials)**

Allocation:

|    |                                  |     |                                                                                                                                                                                                                                                                                                                                                          |      |
|----|----------------------------------|-----|----------------------------------------------------------------------------------------------------------------------------------------------------------------------------------------------------------------------------------------------------------------------------------------------------------------------------------------------------------|------|
| 26 | Sequence generation              | 16a | Method of generating the allocation sequence (eg, computer-generated random numbers), and list of any factors for stratification. To reduce predictability of a random sequence, details of any planned restriction (eg, blocking) should be provided in a separate document that is unavailable to those who enrol participants or assign interventions | n.a. |
| 27 |                                  |     |                                                                                                                                                                                                                                                                                                                                                          |      |
| 28 |                                  |     |                                                                                                                                                                                                                                                                                                                                                          |      |
| 29 |                                  |     |                                                                                                                                                                                                                                                                                                                                                          |      |
| 30 |                                  |     |                                                                                                                                                                                                                                                                                                                                                          |      |
| 31 | Allocation concealment mechanism | 16b | Mechanism of implementing the allocation sequence (eg, central telephone; sequentially numbered, opaque, sealed envelopes), describing any steps to conceal the sequence until interventions are assigned                                                                                                                                                | n.a. |
| 32 |                                  |     |                                                                                                                                                                                                                                                                                                                                                          |      |
| 33 |                                  |     |                                                                                                                                                                                                                                                                                                                                                          |      |
| 34 |                                  |     |                                                                                                                                                                                                                                                                                                                                                          |      |
| 35 |                                  |     |                                                                                                                                                                                                                                                                                                                                                          |      |
| 36 | Implementation                   | 16c | Who will generate the allocation sequence, who will enrol participants, and who will assign participants to interventions                                                                                                                                                                                                                                | n.a. |
| 37 |                                  |     |                                                                                                                                                                                                                                                                                                                                                          |      |
| 38 |                                  |     |                                                                                                                                                                                                                                                                                                                                                          |      |
| 39 | Blinding (masking)               | 17a | Who will be blinded after assignment to interventions (eg, trial participants, care providers, outcome assessors, data analysts), and how                                                                                                                                                                                                                | n.a. |
| 40 |                                  |     |                                                                                                                                                                                                                                                                                                                                                          |      |
| 41 |                                  |     |                                                                                                                                                                                                                                                                                                                                                          |      |
| 42 |                                  |     |                                                                                                                                                                                                                                                                                                                                                          |      |

1 17b If blinded, circumstances under which unblinding is permissible, and procedure for revealing a participant's n.a.  
2 allocated intervention during the trial  
3

4 **Methods: Data collection, management, and analysis**

6 Data collection 18a Plans for assessment and collection of outcome, baseline, and other trial data, including any related 21-22 (Data  
7 methods processes to promote data quality (eg, duplicate measurements, training of assessors) and a description of collection and  
8 study instruments (eg, questionnaires, laboratory tests) along with their reliability and validity, if known. management)  
9 Reference to where data collection forms can be found, if not in the protocol  
10  
11  
12 18b Plans to promote participant retention and complete follow-up, including list of any outcome data to be \_\_\_\_\_  
13 collected for participants who discontinue or deviate from intervention protocols  
14  
15 Data management 19 Plans for data entry, coding, security, and storage, including any related processes to promote data quality 21-22(Data  
16 (eg, double data entry; range checks for data values). Reference to where details of data management collection and  
17 procedures can be found, if not in the protocol management)  
18  
19  
20 Statistical methods 20a Statistical methods for analysing primary and secondary outcomes. Reference to where other details of the 22(Data Analysis)  
21 statistical analysis plan can be found, if not in the protocol  
22  
23 20b Methods for any additional analyses (eg, subgroup and adjusted analyses) 22 (Data Analysis)  
24  
25 20c Definition of analysis population relating to protocol non-adherence (eg, as randomised analysis), and any n.a.  
26 statistical methods to handle missing data (eg, multiple imputation)  
27  
28

29 **Methods: Monitoring**

31 Data monitoring 21a Composition of data monitoring committee (DMC); summary of its role and reporting structure; statement of n.a.  
32 whether it is independent from the sponsor and competing interests; and reference to where further details  
33 about its charter can be found, if not in the protocol. Alternatively, an explanation of why a DMC is not  
34 needed  
35  
36  
37 21b Description of any interim analyses and stopping guidelines, including who will have access to these interim n.a.  
38 results and make the final decision to terminate the trial  
39  
40 Harms 22 Plans for collecting, assessing, reporting, and managing solicited and spontaneously reported adverse n.a.  
41 events and other unintended effects of trial interventions or trial conduct  
42



|    |                                 |     |                                                                                                                                                                                                                                                                                     |                                                |
|----|---------------------------------|-----|-------------------------------------------------------------------------------------------------------------------------------------------------------------------------------------------------------------------------------------------------------------------------------------|------------------------------------------------|
| 1  | Auditing                        | 23  | Frequency and procedures for auditing trial conduct, if any, and whether the process will be independent from investigators and the sponsor                                                                                                                                         | n.a.                                           |
| 2  |                                 |     |                                                                                                                                                                                                                                                                                     |                                                |
| 3  |                                 |     |                                                                                                                                                                                                                                                                                     |                                                |
| 4  | <b>Ethics and dissemination</b> |     |                                                                                                                                                                                                                                                                                     |                                                |
| 5  |                                 |     |                                                                                                                                                                                                                                                                                     |                                                |
| 6  | Research ethics approval        | 24  | Plans for seeking research ethics committee/institutional review board (REC/IRB) approval                                                                                                                                                                                           | 24 (Ethics, data protection and dissemination) |
| 7  |                                 |     |                                                                                                                                                                                                                                                                                     |                                                |
| 8  |                                 |     |                                                                                                                                                                                                                                                                                     |                                                |
| 9  |                                 |     |                                                                                                                                                                                                                                                                                     |                                                |
| 10 |                                 |     |                                                                                                                                                                                                                                                                                     |                                                |
| 11 | Protocol amendments             | 25  | Plans for communicating important protocol modifications (eg, changes to eligibility criteria, outcomes, analyses) to relevant parties (eg, investigators, REC/IRBs, trial participants, trial registries, journals, regulators)                                                    | n.a.                                           |
| 12 |                                 |     |                                                                                                                                                                                                                                                                                     |                                                |
| 13 |                                 |     |                                                                                                                                                                                                                                                                                     |                                                |
| 14 |                                 |     |                                                                                                                                                                                                                                                                                     |                                                |
| 15 | Consent or assent               | 26a | Who will obtain informed consent or assent from potential trial participants or authorised surrogates, and how (see Item 32)                                                                                                                                                        | 16-17(Recruitment)                             |
| 16 |                                 |     |                                                                                                                                                                                                                                                                                     |                                                |
| 17 |                                 |     |                                                                                                                                                                                                                                                                                     |                                                |
| 18 |                                 | 26b | Additional consent provisions for collection and use of participant data and biological specimens in ancillary studies, if applicable                                                                                                                                               | n.a.                                           |
| 19 |                                 |     |                                                                                                                                                                                                                                                                                     |                                                |
| 20 |                                 |     |                                                                                                                                                                                                                                                                                     |                                                |
| 21 | Confidentiality                 | 27  | How personal information about potential and enrolled participants will be collected, shared, and maintained in order to protect confidentiality before, during, and after the trial                                                                                                | 21-22(Data collection and management)          |
| 22 |                                 |     |                                                                                                                                                                                                                                                                                     |                                                |
| 23 |                                 |     |                                                                                                                                                                                                                                                                                     |                                                |
| 24 |                                 |     |                                                                                                                                                                                                                                                                                     |                                                |
| 25 |                                 |     |                                                                                                                                                                                                                                                                                     |                                                |
| 26 | Declaration of interests        | 28  | Financial and other competing interests for principal investigators for the overall trial and each study site                                                                                                                                                                       | 26 (Declarations)                              |
| 27 |                                 |     |                                                                                                                                                                                                                                                                                     |                                                |
| 28 |                                 |     |                                                                                                                                                                                                                                                                                     |                                                |
| 29 | Access to data                  | 29  | Statement of who will have access to the final trial dataset, and disclosure of contractual agreements that limit such access for investigators                                                                                                                                     | 21-22 (Data collection and management)         |
| 30 |                                 |     |                                                                                                                                                                                                                                                                                     |                                                |
| 31 |                                 |     |                                                                                                                                                                                                                                                                                     |                                                |
| 32 |                                 |     |                                                                                                                                                                                                                                                                                     |                                                |
| 33 |                                 |     |                                                                                                                                                                                                                                                                                     |                                                |
| 34 | Ancillary and post-trial care   | 30  | Provisions, if any, for ancillary and post-trial care, and for compensation to those who suffer harm from trial participation                                                                                                                                                       | n.a.                                           |
| 35 |                                 |     |                                                                                                                                                                                                                                                                                     |                                                |
| 36 |                                 |     |                                                                                                                                                                                                                                                                                     |                                                |
| 37 | Dissemination policy            | 31a | Plans for investigators and sponsor to communicate trial results to participants, healthcare professionals, the public, and other relevant groups (eg, via publication, reporting in results databases, or other data sharing arrangements), including any publication restrictions | 24 (Ethics, data protection and dissemination) |
| 38 |                                 |     |                                                                                                                                                                                                                                                                                     |                                                |
| 39 |                                 |     |                                                                                                                                                                                                                                                                                     |                                                |
| 40 |                                 |     |                                                                                                                                                                                                                                                                                     |                                                |
| 41 |                                 |     |                                                                                                                                                                                                                                                                                     |                                                |
| 42 |                                 |     |                                                                                                                                                                                                                                                                                     |                                                |
| 43 |                                 |     |                                                                                                                                                                                                                                                                                     |                                                |
| 44 |                                 |     |                                                                                                                                                                                                                                                                                     |                                                |
| 45 |                                 |     |                                                                                                                                                                                                                                                                                     |                                                |
| 46 |                                 |     |                                                                                                                                                                                                                                                                                     |                                                |

|    |                            |                                                                                                                 |                                                                                                                                                                                                |
|----|----------------------------|-----------------------------------------------------------------------------------------------------------------|------------------------------------------------------------------------------------------------------------------------------------------------------------------------------------------------|
| 1  | 31b                        | Authorship eligibility guidelines and any intended use of professional writers                                  | n.a.                                                                                                                                                                                           |
| 2  |                            |                                                                                                                 |                                                                                                                                                                                                |
| 3  | 31c                        | Plans, if any, for granting public access to the full protocol, participant-level dataset, and statistical code | n.a.                                                                                                                                                                                           |
| 4  |                            |                                                                                                                 |                                                                                                                                                                                                |
| 5  | <b>Appendices</b>          |                                                                                                                 |                                                                                                                                                                                                |
| 6  |                            |                                                                                                                 |                                                                                                                                                                                                |
| 7  | Informed consent materials | 32                                                                                                              | Model consent form and other related documentation given to participants and authorised surrogates                                                                                             |
| 8  |                            |                                                                                                                 | -                                                                                                                                                                                              |
| 9  |                            |                                                                                                                 |                                                                                                                                                                                                |
| 10 | Biological specimens       | 33                                                                                                              | Plans for collection, laboratory evaluation, and storage of biological specimens for genetic or molecular analysis in the current trial and for future use in ancillary studies, if applicable |
| 11 |                            |                                                                                                                 | n.a.                                                                                                                                                                                           |
| 12 |                            |                                                                                                                 |                                                                                                                                                                                                |

13  
14 \*It is strongly recommended that this checklist be read in conjunction with the SPIRIT 2013 Explanation & Elaboration for important clarification on the items.  
15 Amendments to the protocol should be tracked and dated. The SPIRIT checklist is copyrighted by the SPIRIT Group under the Creative Commons  
16 "[Attribution-NonCommercial-NoDerivs 3.0 Unported](https://creativecommons.org/licenses/by-nc-nd/3.0/)" license.  
17  
18  
19  
20  
21  
22  
23  
24  
25  
26  
27  
28  
29  
30  
31  
32  
33  
34  
35  
36  
37  
38  
39  
40  
41  
42  
43  
44  
45  
46

# BMJ Open

## Improving continuity of patient care across sectors: Study protocol of the process evaluation of a quasi-experimental multi-centre study regarding an admission and discharge model in Germany (VESPEERA)

|                                 |                                                                                                                                                                                                                                                                                                                                                                                                                                                                                                                                                                                                                                                                  |
|---------------------------------|------------------------------------------------------------------------------------------------------------------------------------------------------------------------------------------------------------------------------------------------------------------------------------------------------------------------------------------------------------------------------------------------------------------------------------------------------------------------------------------------------------------------------------------------------------------------------------------------------------------------------------------------------------------|
| Journal:                        | <i>BMJ Open</i>                                                                                                                                                                                                                                                                                                                                                                                                                                                                                                                                                                                                                                                  |
| Manuscript ID                   | bmjopen-2019-031245.R1                                                                                                                                                                                                                                                                                                                                                                                                                                                                                                                                                                                                                                           |
| Article Type:                   | Protocol                                                                                                                                                                                                                                                                                                                                                                                                                                                                                                                                                                                                                                                         |
| Date Submitted by the Author:   | 11-Sep-2019                                                                                                                                                                                                                                                                                                                                                                                                                                                                                                                                                                                                                                                      |
| Complete List of Authors:       | Forstner, Johanna; Heidelberg University, Department of General Practice and Health Services Research<br>Kunz, Aline; Heidelberg University, Department of General Practice and Health Services Research<br>Straßner, Cornelia; Heidelberg University, Department of General Practice and Health Services Research<br>Uhlmann, Lorenz; Heidelberg University, Institute of Medical Biometry and Informatics<br>Kümmel, Stephanie; aQua-Institut GmbH<br>Szecsenyi, Joachim; Heidelberg University, Department of General Practice and Health Services Research<br>Wensing, M; Heidelberg University, Department of General Practice and Health Services Research |
| <b>Primary Subject Heading</b>: | Health services research                                                                                                                                                                                                                                                                                                                                                                                                                                                                                                                                                                                                                                         |
| Secondary Subject Heading:      | General practice / Family practice                                                                                                                                                                                                                                                                                                                                                                                                                                                                                                                                                                                                                               |
| Keywords:                       | process evaluation, CFIR, determinants for implementation, admission management, discharge management, continuity of care                                                                                                                                                                                                                                                                                                                                                                                                                                                                                                                                        |
|                                 |                                                                                                                                                                                                                                                                                                                                                                                                                                                                                                                                                                                                                                                                  |

SCHOLARONE™  
Manuscripts

1  
2  
3 **Title:** Improving continuity of patient care across sectors: Study protocol of the process  
4 evaluation of a quasi-experimental multi-centre study regarding an admission and  
5 discharge model in Germany (VESPEERA)  
6  
7  
8  
9

10 **Authors:** Forstner, Johanna; Kunz, Aline; Straßner, Cornelia; Uhlmann, Lorenz; Kuemmel,  
11 Stephanie; Szecsenyi, Joachim; Wensing, Michel  
12  
13  
14

15 **Word count** (from Background to Ethics, data protection and security, and  
16 dissemination; excluding title page, abstract, references, figures and tables): 3,937  
17  
18  
19

20  
21 Johanna Forstner  
22

23  
24 University Hospital Heidelberg, Department for General Practice and Health Services  
25  
26 Research  
27

28  
29 Heidelberg, Germany  
30  
31

32  
33 Aline Kunz  
34

35  
36 University Hospital Heidelberg, Department for General Practice and Health Services  
37  
38 Research  
39

40  
41 Heidelberg, Germany  
42  
43

44  
45 Dr. med. Cornelia Straßner  
46  
47

48  
49 University Hospital Heidelberg, Department for General Practice and Health Services  
50  
51 Research  
52

53  
54 Heidelberg, Germany  
55  
56

57  
58 Dr. Lorenz Uhlmann  
59  
60

1  
2 University Hospital Heidelberg, Institute for Medical Biometry and Informatics, Dept. for  
3  
4 Medical Biometry  
5

6  
7 Heidelberg, Germany  
8  
9

10  
11 Kuemmel, Stephanie  
12  
13

14  
15 aQua-Institute  
16  
17

18  
19 Göttingen, Germany  
20  
21

22  
23 Prof. Dr. med. Dipl. Soz. Joachim Szecsenyi  
24  
25

26  
27 University Hospital Heidelberg, Department for General Practice and Health Services  
28  
29 Research  
30  
31

32  
33 Heidelberg, Germany  
34  
35

36  
37 Prof. Dr. Michel Wensing  
38  
39

40  
41 University Hospital Heidelberg, Department for General Practice and Health Services  
42  
43 Research  
44  
45

46  
47 Heidelberg, Germany  
48  
49

50  
51 Corresponding author:  
52  
53

54  
55 Johanna Forstner  
56  
57

58  
59 University Hospital Heidelberg, Department for General Practice and Health Services  
60  
61 Research

62  
63 Im Neuenheimer Feld 130.3, Marsilius Arkaden, Turm West, D-69120 Heidelberg  
64  
65  
66

1  
2 Phone: 06221 / 56 35559  
3

4  
5 Fax: 06221 / 56 1972  
6

7  
8 E-Mail: johanna.forstner@med.uni-heidelberg.de  
9

## 10 11 12 13 14 **Abstract**

15  
16  
17  
18 **Introduction:** Hospital stays are critical events as they often disrupt continuity of care.  
19  
20 This process evaluation aims to describe and explore the implementation of the  
21  
22 VESPEERA programme. The evaluation concerns the intervention fidelity, reach in  
23  
24 targeted populations, perceived effects, working mechanisms, feasibility,  
25  
26 determinants for implementation, including contextual factors, and associations with  
27  
28 the outcomes evaluation. The aim of the VESPEERA programme is the development,  
29  
30 implementation and evaluation of a structured admission and discharge program in  
31  
32 general practices and hospitals.  
33  
34

35  
36  
37 **Methods and analysis:** The process evaluation is linked to the VESPEERA outcomes  
38  
39 evaluation, which has a quasi-experimental multi-centre design with four study arms  
40  
41 and is conducted in hospitals and general practices in Germany. The VESPEERA  
42  
43 programme comprises several components: an assessment before admission, an  
44  
45 admission letter, a telephonic discharge conversation between hospital and general  
46  
47 practice before discharge, discharge information for patients, structured planning of  
48  
49 follow-up care after discharge in the general practice and a telephone monitoring for  
50  
51 patients with a risk of rehospitalisation.  
52  
53

54  
55  
56 The process evaluation has a mixed-methods design, incorporating interviews  
57  
58 (patients, both care providers who do and do not participate in the VESPEERA  
59  
60 programme, total n=75), questionnaires (patients and care providers who participate

1  
2 in the VESPEERA programme, total n=475), implementation plans of hospitals, data  
3  
4 documented in general practices, claims-based data and hospital process data.  
5  
6

7 Data analysis is descriptive and explorative. Qualitative data will be transcribed and  
8  
9 analysed using framework analysis based on the Consolidated Framework for  
10  
11 Implementation Research. Associations between the outcomes of the program and  
12  
13 measures in the process evaluation will be explored in regression models.  
14  
15  
16

17 **Ethics and dissemination:** Ethics approval has been obtained by the ethics committee  
18  
19 of the Medical Faculty Heidelberg prior to the start of the study (S-352/2018). Results will  
20  
21 be disseminated through a final report to the funding agency, articles in peer-  
22  
23 reviewed journals, and conferences.  
24  
25

26  
27 **Trial Registration:** DRKS00015183 on DRKS / Universal Trial Number (UTN): U1111-1218-  
28  
29 0992  
30  
31

32 **Key Words:** process evaluation, implementation science, intervention fidelity, CFIR,  
33  
34 barriers, facilitators, admission management, discharge management, continuity of  
35  
36 care  
37  
38  
39

#### 40 **Strengths and limitations of this study:**

- 41  
42  
43 • The process evaluation will help to interpret the findings of the outcomes  
44  
45 evaluation of a hospital admission and discharge program.  
46  
47
- 48 • The perspectives of a broad range of stakeholders are considered, including  
49  
50 care providers, patients and other stakeholders.  
51
- 52 • This mixed-methods process evaluation addresses a broad range of aspects,  
53  
54 which are associated with implementation and outcomes of the VESPEERA  
55  
56 programme.  
57  
58  
59  
60

- Linkage of interview and questionnaire data with data sources of the outcome evaluation is not possible at individual level.

For peer review only

1  
2  
3  
4  
5  
6  
7  
8  
9  
10  
11  
12  
13  
14  
15  
16  
17  
18  
19  
20  
21  
22  
23  
24  
25  
26  
27  
28  
29  
30  
31  
32  
33  
34  
35  
36  
37  
38  
39  
40  
41  
42  
43  
44  
45  
46  
47  
48  
49  
50  
51  
52  
53  
54  
55  
56  
57  
58  
59  
60



## Introduction

Insufficient communication between hospitals and physicians in the outpatient sector may jeopardize the recovery process, lead to avoidable rehospitalisations[1, 2] and induce adverse events.[3] These outcomes also affect health related patient satisfaction and healthcare costs.[4] The legislator in Germany responded to this care problem by obligating hospitals to offer discharge management measures to all patients (*"Rahmenvertrag über ein Entlassmanagement beim Übergang in die Versorgung nach Krankenhausbehandlung nach § 39 Abs. 1 S.9 SGB V"*). The VESPEERA programme aims to support the implementation of this regulation. It develops, implements, and evaluates a structured hospital admission and discharge program between general practices and hospitals to avoid interruptions in the hospital admission and discharge process. An overview on the intervention components and the outcomes evaluation is given down below and are described in detail elsewhere.[5] Subsequently, we first summarize the patient-directed interventions in the VESPEERA programme, the VESPEERA outcomes evaluation, and the implementation strategies. Then we elaborate on the process evaluation in the remaining of this paper.

### VESPEERA programme

Legislation in Germany is focused on hospital discharge and does not address admission management. The VESPEERA programme supports the implementation of structured discharge management and, amongst others, adds admission management procedures and further outpatient care after discharge in general practices . If admitted to the hospital electively, the general practitioner (GP) will conduct an assessment with the patient in order to generate an admission letter for

the hospital, providing medical and social information on the patient before hospital admission. Intervention components in the hospital include a telephonic discharge conversation for defined high-risk patients between the hospital and the general practice as well as a patient discharge information. After discharge, another assessment will be conducted in the general practice to facilitate planning of follow-up care (such as medication plans, referrals to specialists, prescriptions for medication and medical products and devices) and to identify patients with an increased risk for rehospitalisation based on the HOSPITAL Score (a score to determine risk of 30-day rehospitalisation[6]). These patients will be enrolled in a three-month telephone monitoring. Patients who had an emergency admission will receive the assessment for planning of follow-up care and, if eligible, the telephone monitoring. Table 1 gives an overview on the intervention components and study arms.

Table 1: **VESPEERA intervention components for all study arms**

| <b>Interventions</b> |                                                                           | <i>Study arm</i>                                          | <i>Study arm</i>                                              | <i>Study arm</i>                                            | <i>Study arm</i>                                                | <i>Study arm</i>                                       |
|----------------------|---------------------------------------------------------------------------|-----------------------------------------------------------|---------------------------------------------------------------|-------------------------------------------------------------|-----------------------------------------------------------------|--------------------------------------------------------|
|                      |                                                                           | 1: <b>planned admission into a participating hospital</b> | 2: <b>planned admission into a non-participating hospital</b> | 3: <b>unplanned admission into a participating hospital</b> | 4: <b>unplanned admission into a non-participating hospital</b> | 5: <b>control group, not participating in VESPEERA</b> |
| General practice     | <b>Interventions in the general practice before admission:</b>            |                                                           |                                                               |                                                             |                                                                 |                                                        |
|                      | (A) assessment for admission<br>(B) admission letter and patient brochure | X                                                         | X                                                             |                                                             |                                                                 |                                                        |

|                  |                                                                                                                                                                                         |   |   |   |   |  |
|------------------|-----------------------------------------------------------------------------------------------------------------------------------------------------------------------------------------|---|---|---|---|--|
| Hospital         | <b>Interventions in the hospital:</b><br>(C) telephonic discharge conversation<br>(D) determination of HOSPITAL Score and patient discharge information                                 | X |   |   |   |  |
| General practice | <b>Interventions in the general practice after discharge:</b><br>(E) assessment for planning of follow-up care<br>(F) telephone monitoring, depending on the risk for rehospitalisation | X | X | X | X |  |

### VESPEERA outcomes evaluation

The VESPEERA programme is "expected to reduce the number of avoidable rehospitalisations and emergency care contacts, to improve patient safety and patient involvement, to reduce overuse, underuse and misuse of health care, to improve the continuity of care and to improve interprofessional and cross-sectoral communication between patients, hospitals, general practices and the sickness fund 'Allgemeine Ortskrankenkasse (AOK) Baden-Württemberg'".[5]

The intervention is evaluated in a quantitative outcomes evaluation with a quasi-experimental design. The primary outcome is the number of rehospitalisations due to the same indication (three-digit ICD-10-GM code) within a time frame of three months (90 days) to the outpatient sector. The following indicators have been defined as secondary outcomes: rehospitalisation due to the same indication within 30 days; hospitalisations due to ambulatory care-sensitive conditions; delayed prescription of

1  
2 medication and medical products/ devices and referral to other health practitioner/s  
3  
4 after discharge; utilisation of emergency or rescue services within three months;  
5  
6 average care cost per year and patient participating in the VESPEERA programme.  
7  
8

9  
10 Using AOK claims data, patient data from the CareCockpit, and data collected in a  
11  
12 questionnaire-based patient survey, a difference-in-difference model is applied for  
13  
14 the primary analysis. The change of the primary outcome (before vs. after the  
15  
16 intervention) of each intervention group will be pairwise compared to the control  
17  
18 group. A detailed description of the outcomes evaluation can be found in the  
19  
20 corresponding study protocol.[5]  
21  
22

### 23 24 25 26 27 28 **Implementation strategies**

29  
30  
31 Several strategies were applied to support the implementation of structured hospital  
32  
33 admission and discharge management. The strategies are named according to the  
34  
35 ERIC compilation by Powell et al.[7] and are reported using the recommendations by  
36  
37 Proctor et al.[8] are as following:  
38  
39

40  
41 First, consensus discussions with representatives of all stakeholders, thus physicians, GPs,  
42  
43 patients, sickness funds and researchers, have been conducted. All intervention  
44  
45 components were thoroughly discussed in the developmental period concerning the  
46  
47 relevance of items, wording of items and design of documents, such as the patient  
48  
49 discharge information. By involving users in the development of the intervention,  
50  
51 acceptance and attractiveness of the programme are expected to increase.  
52  
53

54  
55 Second, formal commitments are obtained by participating hospitals. Adaptability is  
56  
57 promoted in order to facilitate the integration of study components into clinical  
58  
59 processes. Therefore, each hospital will provide information on how they will ensure  
60

1  
2 the identification of study patients, the use of the admission letter, the execution of the  
3 telephonic discharge conversation, the dissemination of the patient discharge  
4 information and the transmission data to calculate the HOSPITAL Score. These formal  
5 commitments are obtained within four weeks after signing the participation  
6 agreement. Thereby, intervention fidelity as well as acceptance and attractiveness of  
7 the VESPEERA programme are expected to increase.  
8  
9

10  
11  
12  
13  
14  
15  
16 Third, the record system is changed by enhancing the PraCMan-Cockpit, software  
17 that is routinely used in Baden-Wuerttemberg within the PracMan case management  
18 programme.[9] The resulting CareCockpit includes the additional VESPEERA module,  
19 which assists general practices with organising patient information, conducting the  
20 assessments and care planning, generating the admission letter and other documents,  
21 and administrating telephone calls within the telephone monitoring. The CareCockpit  
22 is software that works independently from the practice information system and is used  
23 by the Care Assistant in General Practice (*Versorgungsassistentin in der Hausarztpraxis*,  
24 VERAH) and the GP. Furthermore, the CareCockpit works as an electronical case  
25 report form for data analysis within the outcomes evaluation.  
26  
27  
28  
29  
30  
31  
32  
33  
34  
35  
36  
37  
38  
39

40 Fourth, train-the-trainer strategies are used in order to instruct GPs and VERAHs in  
41 software utilisation and study processes. Trainers are teams of two (GP and VERAH)  
42 who are experienced in training the PraCMan-Cockpit and who were instructed in  
43 handling the CareCockpit by the study central office. GPs and VERAHs who are  
44 interested in participating in the VESPEERA programme sign up for a one-time 2.5 hour  
45 training. GPs and VERAHs learn the handling of the software in a role-play format.  
46  
47  
48  
49  
50  
51  
52  
53

54 Fifth, in order to support GPs and VERAHs with implementation of all intervention  
55 components, educational materials are developed. Investigator site files are provided  
56 after participation in the training by the study central office. Investigator site files  
57  
58  
59  
60

1  
2 contain instructions and background information on the following: obtaining informed  
3  
4 consent by patients, installation of the CareCockpit-software, an overview on  
5  
6 frequently asked questions concerning the handling of the software, conduction of  
7  
8 the intervention components, and conduction of the patient survey. Furthermore,  
9  
10 general practices are continuously provided with instructional video tutorials on  
11  
12 handling the software by the study central office. Along with the trainings, educational  
13  
14 materials are expected to increase intervention fidelity.  
15  
16

17  
18 Sixth, both participating general practices and hospitals are provided ongoing  
19  
20 consultation with the study central office and other consortium partners to support  
21  
22 implementation. General practices and hospitals are repeatedly called by employees  
23  
24 of the study central office and asked for the status of implementation and any  
25  
26 problems that arise within the implementation process. General practices are offered  
27  
28 refreshers on topics of the training, such as the procedure for obtaining informed  
29  
30 consent by patients, handling of the software, and instruction of the intervention  
31  
32 components. Thereby, intervention fidelity is expected to increase.  
33  
34  
35  
36

37  
38 Seventh, hospitals and general practices are provided feedback in the form of three  
39  
40 benchmarking reports in September 2018, June 2019 and December 2019. The  
41  
42 feedback reports are based on structured, quantified data-sources (claims data,  
43  
44 patient data from the CareCockpit, and patient survey data), and are aggregated  
45  
46 on a hospital or general practice level. These will be discussed in three moderated  
47  
48 feedback meetings during the intervention period with care providers, where options  
49  
50 for potential improvement will be developed. Feedback meetings are planned for  
51  
52 September 2018, September 2019 and March 2020. Feedback meetings are  
53  
54 moderated by the study central office with support by the other project partners. Care  
55  
56 providers will have an active role in the meetings in a workshop format and report their  
57  
58 perspective and experiences. Audit and feedback is a strategy to improve  
59  
60

1  
2 professional practice, which has mixed and overall moderate impacts on professional  
3 performance.[10, 11] In this context, feedback provided is expected to enhance  
4  
5 intervention fidelity.  
6  
7

8  
9  
10 Additionally, hospitals and general practices will receive fee-for-service for  
11  
12 conducting patient-related care services as well as lump sum reimbursement for study  
13  
14 organisation and participation in workshops and feedback meetings. General  
15  
16 practices can invoice the care services as part of their usual invoice process, which is  
17  
18 carried out at the end of each quarter year. Hospitals invoice the sickness fund  
19  
20 'Allgemeine Ortskrankenkasse' (AOK) Baden-Wurttemberg at the end of each quarter  
21  
22 year. Lump sums are paid after participating in the feedback meetings. Fee-for-service  
23  
24 gives an incentive to provide the different interventions components and thereby is  
25  
26 expected to increase intervention fidelity.[12]  
27  
28  
29

### 30 **VESPEERA process evaluation**

31  
32  
33 The VESPEERA programme is a complex intervention which intends to impact on a  
34  
35 range of outcomes. The impact on outcomes depends not only on the effectiveness  
36  
37 of planned interventions, but also on the degree of implementation of these  
38  
39 interventions, the reach in relevant healthcare providers and patient populations, and  
40  
41 the moderating impacts of the organisational and societal context in which the  
42  
43 interventions are applied. As described by the Medical Research Council, complex  
44  
45 interventions are characterized by multiple, mutually interacting intervention  
46  
47 components; multiple targeted groups of individuals and organisations; multiple  
48  
49 outcomes and mediating factors; high impact of the organisational and societal  
50  
51 context on outcomes; and a "degree of flexibility or tailoring of the interventions".[13]  
52  
53 These features largely apply to VESPEERA. A large number of interventions are applied;  
54  
55  
56 various organisations in different care sectors are involved, each with structural  
57  
58  
59  
60

1  
2 conditions specific to the sector (e.g. remuneration systems). The effects of the  
3  
4 interventions cover a range of domains.[5] Furthermore, hospitals are involved in the  
5  
6 implementation within their organisation to tailor it to their local processes and  
7  
8 structures.  
9

10  
11  
12 We planned a process evaluation to provide insight into how well the intervention was  
13  
14 implemented, why it did or did not work (i.e. did or did not have an effect on  
15  
16 outcomes),[13-15] what context factors had an influence on the implementation and  
17  
18 outcomes, and thereby allow to improve "transferability of potentially effective  
19  
20 programs to other settings".[16] Investigation of implementation outcomes such as  
21  
22 reach (whether the targeted population participated as intended/ the degree to  
23  
24 which the targeted population participated) or intervention fidelity (whether the  
25  
26 intervention was delivered as planned) can help to better understand the results of  
27  
28 the outcomes evaluation.[17]  
29  
30  
31  
32  
33  
34  
35

### 36 Objectives

37  
38  
39 This process evaluation aims to examine the intervention fidelity, reach in targeted  
40  
41 populations, perceived effects, working mechanisms, feasibility, and determinants for  
42  
43 implementation, including contextual factors, as well as associations with the  
44  
45 outcomes evaluation, so that programme outcomes can be better interpreted. The  
46  
47 research questions that are of interest within this process evaluation are illustrated in  
48  
49 table 2.  
50  
51  
52  
53

54 **Table 2:** Research questions

|                                                                                                                            |
|----------------------------------------------------------------------------------------------------------------------------|
| 56 1. REACH AND INTERVENTION FIDELITY                                                                                      |
| 57 a) Was the intervention implemented as planned ("intervention fidelity") in targeted<br>58 populations ("reach")?<br>59 |



|    |                                                                                               |
|----|-----------------------------------------------------------------------------------------------|
| 1  |                                                                                               |
| 2  |                                                                                               |
| 3  | b) To what extent have the planned components been offered to care providers and              |
| 4  | patients?                                                                                     |
| 5  | c) To what extent have these been utilised by care providers and patients?                    |
| 6  | d) What was the adherence concerning the recommended practices of hospital admission          |
| 7  | and discharge?                                                                                |
| 8  | e) Has the targeted patient population been reached?                                          |
| 9  |                                                                                               |
| 10 | <b>2. PERCEIVED EFFECTS:</b>                                                                  |
| 11 | Which results, from the view point of care providers and patients, were:                      |
| 12 | a) Achieved as intended?                                                                      |
| 13 | b) Not achieved although intended?                                                            |
| 14 | c) Achieved although not intended (positive or negative)?                                     |
| 15 |                                                                                               |
| 16 | <b>3. WORKING MECHANISMS:</b>                                                                 |
| 17 | Which components and aspects of the intervention programme contributed to achieving the       |
| 18 | results from the view point of care providers?                                                |
| 19 |                                                                                               |
| 20 | <b>4. FEASIBILITY:</b>                                                                        |
| 21 | What were acceptability and attractiveness of the programme from the point of view of care    |
| 22 | providers?                                                                                    |
| 23 |                                                                                               |
| 24 | <b>5. CONTEXTUAL FACTORS</b>                                                                  |
| 25 | a) What are determinants for implementing the program?                                        |
| 26 | b) Which contextual factors on system, hospital and practice level influenced the adoption of |
| 27 | intervention components and outcomes of the programme?                                        |
| 28 | c) Which practices concerning admission and discharge management have been                    |
| 29 | implemented in non-participating hospitals during the intervention period (for example in     |
| 30 | consequence of the new regulation on hospital discharge management)?                          |
| 31 |                                                                                               |
| 32 | <b>6. DOSE-RESPONSE ASSOCIATIONS:</b>                                                         |
| 33 | Which associations exist between the outcomes (as disclosed by the outcomes evaluation)       |
| 34 | and findings of the process evaluation?                                                       |

Figure 1 shows the hypothesized working mechanisms of the VESPEERA programme and the primary areas of interest of the outcomes and the process evaluation, respectively. The planned procedures for the process evaluation will be described in detail below.

< Insert Figure 1 here >

## Methods of process evaluation

### Study design

The process evaluation has an observational mixed-methods design, incorporating qualitative data from interviews and implementation plans with a description of the

1  
2 implementation in participating hospitals as well as quantitative data from  
3  
4 questionnaires that are filled in for each patient in hospital, surveys and data collected  
5  
6 through the CareCockpit software in general practices. This process evaluation is part  
7  
8 of the VESPEERA study that lasts from October 2017 until March 2021. The planned time  
9  
10 frame for the process evaluation started in July 2018; evaluations will be complete by  
11  
12 the end of March 2021.  
13  
14

### 15 16 Study setting

17  
18 The VESPEERA programme is implemented in 25 hospital departments and 115 general  
19  
20 practices in a defined region in southern Germany. The process evaluation is carried  
21  
22 out by the Department of General Practice and Health Services Research at the  
23  
24 Heidelberg University Hospital.  
25  
26  
27

### 28 29 Eligibility criteria

30  
31 Patients who take part and gave their informed consent to the VESPEERA study  
32  
33 participation and outcomes evaluation can participate in the process evaluation. GPs  
34  
35 and VERAHs who participate in the VESPEERA study can participate in the process  
36  
37 evaluation. Hospital staff from participating hospitals has to work in one of the  
38  
39 departments selected for VESPEERA implementation OR have to be involved in the  
40  
41 implementation process of the VESPEERA intervention components on a higher  
42  
43 hierarchical level (such as hospital management). Physicians, nursing staff and hospital  
44  
45 management from non-participating hospitals as well as GPs and VERAHs from non-  
46  
47 participating general practices are included if they can provide insight into their  
48  
49 regular admission and discharge processes and the implementation of the new  
50  
51 legislation on hospital discharge management.  
52  
53  
54  
55  
56  
57  
58  
59  
60

1  
2 Above that, all participants have to be 18 years and older, have written and spoken  
3 German language skills and have to be able to give their informed consent into study  
4 participation in the process evaluation. Persons who are unable to give their consent  
5 are excluded from study participation.  
6  
7  
8  
9

### 10 Outcomes of the process evaluation and data sources

11  
12 The process evaluation uses data from a mix of sources, which in the following are  
13 described in detail (an overview on the research questions phrased, outcomes and  
14 data sources used can be found as a supplementary file).  
15  
16  
17  
18  
19  
20  
21

#### 22 *Interviews*

23  
24 Qualitative interviews will be conducted with nursing staff, physicians and  
25 management staff from participating and non-participating hospitals, GPs and  
26 VERAHs from participating and non-participating general practices as well as  
27 participating patients after hospital stay. The interview guide addresses the  
28 intervention fidelity, perceived effects, and factors influencing implementation  
29 (barriers, facilitators, contextual factors) as well as acceptance and attractiveness of  
30 the intervention.  
31  
32  
33  
34  
35  
36  
37  
38  
39  
40  
41

#### 42 *Questionnaires*

43  
44 Additionally, quantitative data result from structured surveys with participating general  
45 practitioners, VERAHs, physicians, nursing staff, management staff, and patients after  
46 a hospital stay. The questionnaire will be designed based on the results of the  
47 qualitative interviews as well as other studies on process evaluations and will be piloted  
48 before use. This pseudonymised questionnaire will not contain any data that allows  
49 identification of participants' identity. Concepts addressed in the questionnaires will  
50 be, amongst others, reach (see research question 1), unintended effects (see research  
51  
52  
53  
54  
55  
56  
57  
58  
59  
60

1  
2 question 2), added value (see research question 3), and barriers and facilitators for  
3  
4 implementation (see research question 5).  
5

#### 6 7 *Hospital Process Data Survey* 8

9  
10 As part of the VESPEERA programme, hospitals are asked to collect the HOSPITAL Score  
11 for patients to determine their risk of rehospitalisation. This questionnaire is expanded  
12 by questions used for the process evaluation. These include sociodemographic  
13 questions and questions on processes that are part of the study interventions that are  
14 implemented within hospitals (identification of VESPEERA patients, utilisation of the  
15 VESPEERA admission letter, telephonic discharge conversation with the general  
16 practice). Data from the hospital process data survey will be used to analyse  
17 intervention fidelity for intervention components within hospitals.  
18  
19  
20  
21  
22  
23  
24  
25  
26  
27  
28

#### 29 *Hospital Implementation Plans* 30

31  
32 In order to facilitate the integration of study components into clinical processes,  
33 different approaches are suitable for different hospitals. Therefore, each hospital will  
34 provide information on how they will ensure the identification of study patients, the use  
35 of the admission letter, the execution of the telephonic discharge conversation, the  
36 dissemination of the patient discharge information and determination of the HOSPITAL  
37 Score. Hospital implementation plans will be used to analyse intervention fidelity for  
38 intervention components within hospitals.  
39  
40  
41  
42  
43  
44  
45  
46  
47  
48

#### 49 *Patient data* 50

51  
52 For the outcomes evaluation, patient data from the CareCockpit is linked with claims-  
53 based data from AOK Baden-Wurttemberg and data from the hospital process data  
54 survey. This data set will be provided for the process evaluation. These data provide  
55 information on the study arm that the patient belongs to as well as patient  
56  
57  
58  
59  
60

1  
2 characteristics, the pseudonym generated in the CareCockpit for data linkage,  
3  
4 diagnoses, the medical question for admission, information on previous antibiotic  
5  
6 prescriptions, living situation, long-term care related items (such as scales for activities  
7  
8 of daily living and instrumental activities of daily living), medical information (such as  
9  
10 pain, wounds, alarming symptoms for medical emergencies, PHQ-2 instrument for  
11  
12 mental disorders screening), compliance to medicinal therapy, the items of the  
13  
14 HOSPITAL Score as well as process data (provision of information to patients,  
15  
16 information on whether any follow-up care has been initiated and successfully  
17  
18 executed). The patient data set will be used for the analysis of reach and intervention  
19  
20 fidelity as well as dose-response associations. The following indicators are used as  
21  
22 outcomes for the analysis of reach and intervention fidelity:  
23  
24  
25

- 26  
27 - Proportion and description of patients who participated in VESPEERA compared to all  
28  
29 targeted persons who meet the inclusion criteria
- 30  
31 - Proportion of persons enrolled in the general practitioner centered-care programme (HZV)  
32  
33 who have been admitted to a participating hospital by a participating practice, for whom a  
34  
35 new patient account has been created in the CareCockpit and for whom a complete  
36  
37 admission letter including a medication plan was generated and was given to the patient to  
38  
39 take along, compared to all participating HZV-insured persons in participating practices with  
40  
41 planned hospital admissions.
- 42  
43 - Proportion of participating patients who have been discharged from a participating hospital to their  
44  
45 GP, for whom at the time of discharge the HOSPITAL Score has been determined, compared  
46  
47 to all participating patients who have been discharged from a participating hospital.
- 48  
49 - Proportion of participating patients for whom the assessment for planning of follow-up  
50  
51 treatment has been conducted compared to all participating patients.
- 52  
53 - Proportion of participating patients who have been enrolled in the follow-up telephone  
54  
55 monitoring due to an intermediate or high risk for rehospitalisation and for whom at least two  
56  
57  
58  
59  
60

1  
2 phone calls have been conducted within the given timeframe of three months, per all  
3 participating patients.

- 4  
5  
6 - The degree to which the intervention components in hospitals have been implemented and  
7 offered as compared to the intention.  
8  
9

### 10 11 Sample size

12  
13  
14 The sample for the qualitative study is planned to reach saturation of data; the  
15 planned numbers are expected to be sufficient. The study sample for interviews on a  
16 hospital level consists of management staff, physicians and nursing staff and will be  
17 stratified by region and hospital size. On a practice level, GPs, VERAHs, and patients  
18 will be recruited from participating practices, stratified by practice size, region and  
19 gender. Additionally, staff from non-participating hospitals and general practices will  
20 be interviewed. This is important as interventions on a systems level can influence the  
21 effects of the evaluated care model. Table 3 gives an overview on the planned  
22 sample size for interviews.  
23  
24  
25  
26  
27  
28  
29  
30  
31  
32  
33  
34

35 **Table 3: Planned sample size for interviews**

|                                            |                       | <b>Planned number of participants<br/>(n)</b> |
|--------------------------------------------|-----------------------|-----------------------------------------------|
| <b>Hospitals</b>                           | Nursing Staff         | 10                                            |
|                                            | Management Staff      | 10                                            |
|                                            | Physicians            | 10                                            |
| <b>Non-participating hospitals</b>         | Nursing Staff         | 5                                             |
|                                            | Management Staff      | 5                                             |
|                                            | Physicians            | 5                                             |
| <b>General Practices</b>                   | General Practitioners | 10                                            |
|                                            | VERAHs                | 10                                            |
| <b>Non-participating general practices</b> | General Practitioners | 10                                            |
|                                            | VERAHs                | 10                                            |
| <b>Patients</b>                            | Patient               | 10                                            |
| <b>Total number</b>                        |                       | <b>75</b>                                     |

The sample for the quantitative survey study comprises of all participating practices and hospitals (full study population) and a sample of n=200 patients for explorative data analysis (see Table 4). The sample size of patients was restricted out of feasibility reasons.

Table 4: **Planned sample size for questionnaires**

|                          |                       | <b>Planned number of participants<br/>(n)</b> |
|--------------------------|-----------------------|-----------------------------------------------|
| <b>Hospitals</b>         | Nursing Staff         | 25                                            |
|                          | Management Staff      | 25                                            |
|                          | Physicians            | 25                                            |
| <b>General Practices</b> | General Practitioners | 100                                           |
|                          | VERAHs                | 100                                           |
| <b>Patients</b>          | Patient               | 200                                           |
| <b>Total number</b>      |                       | <b>475</b>                                    |

### Recruitment

Within the process evaluation, participants will be recruited for interviews and written surveys.

#### *Recruitment for qualitative interviews*

Personnel from non-participating hospitals will be recruited by contacting the hospital management. A purposeful sample of hospitals will be selected, amongst others based on region, top-level versus basic care and previous interest to participate in VESPEERA. GPs and VERAHs from non-participating general practices will be recruited based on a list of all GPs who participate in GP-based care outside of the intervention region. A purposeful sample will be selected based on region, practice size and

1  
2 gender. All participating general practices are asked to recruit eligible patients, as  
3  
4 they are not known to the study central office.  
5  
6

7  
8 By using a response coupon eligible interview participants from all stakeholder groups  
9  
10 can declare their interest in participating in an interview. They will then be contacted  
11  
12 by the study central office, be provided with an information letter and the written  
13  
14 consent form.  
15  
16

### 17 *Recruitment for the survey*

18  
19  
20 Personnel from participating hospitals will be recruited by the contact person at the  
21  
22 hospitals. The contact persons will be provided with information letters, written  
23  
24 informed consent forms and the paper-based questionnaires and will be asked to  
25  
26 hand it out to eligible personnel as defined by the study central office. All participating  
27  
28 general practices will be sent the information letters, informed consent forms and  
29  
30 paper-based questionnaires for GPs and VERAHs and will be asked to fill it in. Patients  
31  
32 will be recruited by the general practices, as they are not known to the study central  
33  
34 office. GPs will be provided with information letters, informed consent forms and  
35  
36 paper-based questionnaires and will be asked to hand it out to eligible patients.  
37  
38  
39  
40

### 41 Data collection and management

#### 42 *Interviews*

43  
44  
45 Interviews will be conducted as face-to-face or telephone interviews by researchers  
46  
47 of the study central office. Interviews will last 30 minutes maximum and will be  
48  
49 conducted using a semi-structured interview guide. In exceptional cases, for instance  
50  
51 if problems within the recruitment process arise, written qualitative interviews consisting  
52  
53 of open-end questions might be used. All interviews will be audio-recorded,  
54  
55  
56  
57  
58  
59  
60



1  
2 transcribed verbatim and stored on a secured server of the study central office.  
3  
4 Transcripts will contain pseudonymized data only.  
5  
6  
7

### 8 *Questionnaires*

9  
10 Paper-based questionnaires are mailed to physicians, VERAHs, nursing staff and  
11 management staff from participating hospitals, GPs and patients. The filled in  
12 questionnaires will be sent by mail using an enclosed post-paid envelope to the study  
13 central office, where they will be scanned and digitally stored on a secured server.  
14  
15 Reminders for data collection of both interviews and questionnaires will be sent out to  
16 all potential participants one to two times via fax, mail or post.  
17  
18  
19  
20  
21  
22  
23  
24  
25  
26  
27  
28  
29  
30  
31  
32  
33

### 34 *Hospital Process Data Survey*

35  
36  
37 Hospitals fill in the hospital process data survey on the conduction of all intervention  
38 components for each case at the time of the patients' discharge, using the form they  
39 use to collect data for the HOSPITAL score used in the VESPEERA study.  
40  
41  
42  
43  
44

45 The hospitals can either integrate the questionnaire into their hospital information  
46 system as an electronic questionnaire (transfer to the aQua-Institute via secure file  
47 transfer protocol (SFTP) servers) or fill in paper-based questionnaires that are sent to  
48 the aQua-Institute via mail using enclosed post-paid envelopes.  
49  
50  
51  
52  
53

### 54 *Hospital Implementation Plans*

55  
56  
57 Participating hospitals will hand in a description of their individual implementation plan  
58 to the study central office.  
59  
60

## *Patient data*

During the intervention period, patient data from the CareCockpit is continuously collected for the purpose of data analysis. Data from the CareCockpit is transferred along with claims-based data each quarter year.

## Data analysis

Data analysis for the process evaluation is descriptive and explorative. Qualitative data will be transcribed according to established standards and will be analysed with regard to the research questions with framework analysis using the software MAXQDA.[18] The framework used for data analysis is the Consolidated Framework for Implementation Research (CFIR).[19] A deductive approach is chosen to assign paraphrases from the interviews to the themes and subthemes of the CFIR. Then, inductive coding within the CFIR themes is carried out and subthemes specific to the project are generated. The CFIR was chosen as it is a comprehensive framework that takes into account many of the aspects that need to be considered when evaluating the implementation of a complex intervention in healthcare organisations.

Quantitative survey data and the indicators for the intervention fidelity will be analysed descriptively. Correlations between the outcomes of the process evaluation and the outcomes evaluation will further be analysed using multilevel regression models. Using patient data, response (e.g. rehospitalisations within 30 days after discharge) will be related to dose of the implementation interventions (e.g. transmission of an admission letter to the hospital), taking clustering of patients in primary care practices into account. As the analysis is explorative, we refrain from a detailed pre-specified analysis plan.

## Patient and public involvement

1  
2 Patients were actively involved in the conduction of all intervention components, as  
3 described in the 'Implementation Strategies' section. With the 'Gesundheitstreffpunkt  
4 Mannheim e.V.' as consortium partner, an organisation representing patient interests  
5 is involved in all stages of the study (funding application, design of the study,  
6  
7  
8  
9  
10  
11  
12  
13  
14  
15  
16  
17  
18  
19  
20  
21  
22  
23  
24  
25  
26  
27  
28  
29  
30  
31  
32  
33  
34  
35  
36  
37  
38  
39  
40  
41  
42  
43  
44  
45  
46  
47  
48  
49  
50  
51  
52  
53  
54  
55  
56  
57  
58  
59  
60

is involved in all stages of the study (funding application, design of the study, conduction of intervention components, interpretation of results, dissemination of results).

## Discussion

This process evaluation aims to provide insight into the implementation process of the VESPEERA programme in the participating general practices and hospital departments as well as the determinants influencing the degree of implementation. The results will contribute to adjusting the VESPEERA programme after the completion of all evaluations for a possible implementation into routine care. By relying on the GP as a gatekeeper to further health care and by proposing communication structures, the VESPEERA programme is expected to improve continuity of care.

Continuity of care is a complex concept with no clear definition.[20] However, recurring components of continuity of care include the first contact with a primary care provider, i.e. gatekeeping, information continuity ("the capacity of that information to travel with the patient and throughout the health system, between providers and over time"[21]) and longitudinal care provider continuity.[2, 20] By improving continuity of care patient outcomes are supposedly improved. In a systematic review, Huntley et al. found that continuity of care, i.e. seeing the same GP, reduced utilisation of emergency departments and emergency hospital admissions.[22] Furthermore, in another systematic review by an Loenen et al. the

1  
2 authors showed that aspects of primary care such as a gatekeeping role and provider  
3  
4 continuity are associated with a lower risk of avoidable hospitalisations due to  
5  
6 ambulant care sensitive conditions.[2]  
7  
8

9  
10 Huntley et al.[22] und van Loenen et al.[2] included mostly observational studies in  
11  
12 their reviews on the effects of organisational features of primary care on  
13  
14 hospitalisations and emergency care use. With a quasi-experimental approach and a  
15  
16 thorough process evaluation, the VESPEERA programme is expected to contribute to  
17  
18 the literature on the effects of continuity of care and care coordination on several  
19  
20 patient outcomes.  
21  
22

23  
24 Within this process evaluation, perspectives of a broad range of stakeholders are  
25  
26 considered. Furthermore, interviews allow for gaining in-depth understanding of  
27  
28 experiences with the VESPEERA programme and communication processes, whereas  
29  
30 questionnaires allow for a higher sample size. Thereby, this serves to understand the  
31  
32 broad implementation of a complex intervention.  
33  
34

35  
36 However, no linkage between interview and questionnaire data with data sources of  
37  
38 the outcome evaluation is intended. The intervention fidelity and barriers and  
39  
40 facilitators to implementing the intervention therefore cannot be linked with patient-  
41  
42 individual outcomes.  
43  
44  
45  
46  
47  
48

## 49 **Ethics, data protection and security, and dissemination**

50  
51  
52  
53 The study protocol has been submitted to and approved by the ethics committee of  
54  
55 the Medical Faculty Heidelberg. A data protection concept is part of the VESPEERA  
56  
57 contractual agreement between consortium partners and has been approved by a  
58  
59  
60

1  
2 data security officer. The regulations of the European General Data Protection  
3 Regulation are met.  
4  
5

6  
7 Dissemination of the results of this study is planned through the final report to the  
8 funding agency, articles in peer-reviewed journals as well as relevant national, and if  
9 relevant, international conferences.  
10  
11  
12  
13  
14  
15  
16  
17

18 **Trial Status:** The study protocol on hand is the protocol version 1.1 from June 18th  
19 2018. Recruitment for interviews started on September 3<sup>rd</sup> 2018 and will approx. be  
20 completed by the end of May 2019.  
21  
22  
23  
24  
25  
26  
27  
28  
29  
30  
31  
32

### 33 **List of Abbreviations**

|    |         |                                                                  |
|----|---------|------------------------------------------------------------------|
| 34 | AOK     | Allgemeine Ortskrankenkasse, large German sickness fund          |
| 35 |         |                                                                  |
| 36 | CFIR    | Consolidated Framework for Implementation Research               |
| 37 |         |                                                                  |
| 38 | GP      | general practitioner                                             |
| 39 |         |                                                                  |
| 40 | HZV     | general practitioner centered-care programme (Hausarztzentrierte |
| 41 |         | Versorgung)                                                      |
| 42 |         |                                                                  |
| 43 | PraCMan | general practice-based case management programme                 |
| 44 |         | (Hausarztpraxis-basiertes Case Management)                       |
| 45 |         |                                                                  |
| 46 | SFTP    | Secure File Transfer Protocol                                    |
| 47 |         |                                                                  |
| 48 |         |                                                                  |
| 49 |         |                                                                  |
| 50 |         |                                                                  |
| 51 |         |                                                                  |
| 52 |         |                                                                  |
| 53 |         |                                                                  |
| 54 |         |                                                                  |
| 55 |         |                                                                  |
| 56 |         |                                                                  |
| 57 |         |                                                                  |
| 58 |         |                                                                  |
| 59 |         |                                                                  |
| 60 |         |                                                                  |

1  
2  
3  
4  
5  
6  
7  
8  
9  
10  
11  
12  
13  
14  
15  
16  
17  
18  
19  
20  
21  
22  
23  
24  
25  
26  
27  
28  
29  
30  
31  
32  
33  
34  
35  
36  
37  
38  
39  
40  
41  
42  
43  
44  
45  
46  
47  
48  
49  
50  
51  
52  
53  
54  
55  
56  
57  
58  
59  
60

VERAH Care Assistant in General Practice (Versorgungsassistentin in der Hausarztpraxis)

VESPEERA Improving continuity of patient care across sectors: A quasi-experimental multi-centre study regarding an admission and discharge model in Germany

## Declarations

Ethics approval and consent to participate: The study protocol has been submitted to and approved by the ethics committee of the Medical Faculty Heidelberg prior to the start of the study (S-352/2018).

Patient consent for publication: Not applicable.

Data sharing: Access to data and materials can be requested from the data owners.

Competing interests: The authors declare that they have no competing interest.

Joachim Szecsenyi holds stocks of the aQua-Institute.

Funding: This work was supported by the Federal Joint Committee (G-BA), Innovation Fund, grant number 01NVF17024. The funder had no role in the design of the study and will not be involved in its execution, data analysis and dissemination of results.

Authors contributions: JF, AK and MW drafted the original manuscript. CS, MW, JF, AK, and SZ have planned the study, planned the data collection and have designed all instruments for data collection. LU provided statistical expertise. SK is involved in data collection of patient data. All authors read and approved the final manuscript.

1  
2 Acknowledgements: Furthermore, we thank all consortium partners of the VESPEERA-  
3 study- 'AOK Baden-Württemberg' for overall project organisation and consortium  
4 leadership, 'University Hospital Heidelberg, Department for General Practice and  
5 Health Services Research' for project coordination, execution of the study and all  
6 study central office related issues, 'aQua-Institute' for data management and  
7 preparation and execution of the patient survey, 'HÄVG Hausärztliche  
8 Vertragsgemeinschaft AG' for organisation of train-the-trainer events, 'University  
9 Hospital Heidelberg, Institute for Medical Biometry and Informatics, Dept. for Medical  
10 Biometry for statistical expertise and statistical analyses and 'Gesundheitstreffpunkt  
11 Mannheim e.V.' for involvement of patients in the development of intervention  
12 components. Moreover, we thank participating hospitals, general practices and  
13 patients. We would like to thank Annika Baldauf and Marion Kiel for organisation and  
14 support of all study central office-related issues.

15  
16  
17  
18  
19  
20  
21  
22  
23  
24  
25  
26  
27  
28  
29  
30  
31  
32 Additional files: SPIRIT Checklist, World Health Organization Trial Registration Data Set,  
33  
34  
35 Figure 1

## 36 37 38 39 40 41 42 Literature

- 43  
44  
45 1. Hesselink G, Schoonhoven L, Barach P, et al.: Improving patient handovers from hospital to  
46 primary care: A systematic review. *Ann Intern Med* 2012, 157(6):417-428.
- 47 2. van Loenen T, van den Berg MJ, Westert GP, Faber MJ: Organizational aspects of primary  
48 care related to avoidable hospitalization: a systematic review. *Fam Pract* 2014, 31(5):502-  
49 516.
- 50 3. Forster AJ, Murff HJ, Peterson JF, Gandhi TK, Bates DW: The Incidence and Severity of  
51 Adverse Events Affecting Patients after Discharge from the Hospital. *Ann Intern Med* 2003,  
52 138(3):161-167.
- 53 4. Goncalves-Bradley DC, Lannin NA, Clemson LM, Cameron ID, Shepperd S: Discharge planning  
54 from hospital. *Cochrane Database Syst Rev* 2016(1):CD000313.
- 55 5. Forstner J, Strassner C, Kunz A, Uhlmann L, Freund T, Peters-Klimm F, Wensing M, Kuemmel  
56 S, El-Kurd N, Rueck R et al: Improving continuity of patient care across sectors: study protocol  
57 of a quasi-experimental multi-centre study regarding an admission and discharge model in  
58 Germany (VESPEERA). *BMC Health Serv Res* 2019, 19:206.
- 59  
60

6. Donze JD, Williams MV, Robinson EJ, Zimlichman E, Aujesky D, Vasilevskis EE, Kripalani S, Metlay JP, Wallington T, Fletcher GS *et al*: International Validity of the HOSPITAL Score to Predict 30-Day Potentially Avoidable Hospital Readmissions. *JAMA Intern Med* 2016, 176(4):496-502.
7. Powell BJ, Waltz TJ, Chinman MJ, Damschroder LJ, Smith JL, Matthieu MM, Proctor EK, Kirchner JE: A refined compilation of implementation strategies: results from the Expert Recommendations for Implementing Change (ERIC) project. *Implementation Science* 2015, 10(1):21.
8. Proctor EK, Powell BJ, McMillen JC: Implementation strategies: recommendations for specifying and reporting. *Implementation Science* 2013, 8(1):139.
9. Freund T, Peters-Klimm F, Boyd CM, *et al*.: Medical assistant-based care management for high-risk patients in small primary care practices: A cluster randomized clinical trial. *Ann Intern Med* 2016, 164(5):323-330.
10. Ivers NM, Sales A, Colquhoun H, Michie S, Foy R, Francis JJ, Grimshaw JM: No more 'business as usual' with audit and feedback interventions: towards an agenda for a reinvigorated intervention. *Implementation Science* 2014, 9(1):14.
11. Ivers N, Jamtvedt G, Flottorp S, Young JM, Odgaard-Jensen J, French SD, O'Brien MA, Johansen M, Grimshaw J, Oxman AD: Audit and feedback: effects on professional practice and healthcare outcomes. *Cochrane Database of Systematic Reviews* 2012(6).
12. Flodgren G, Eccles MP, Shepperd S, Scott A, Parmelli E, Beyer FR: An overview of reviews evaluating the effectiveness of financial incentives in changing healthcare professional behaviours and patient outcomes. *Cochrane Database of Systematic Reviews* 2011(7).
13. Craig P, Dieppe P, Macintyre S, Michie S, Nazareth I, Petticrew M: Developing and evaluating complex interventions: the new Medical Research Council guidance. *BMJ* 2008, 337:a1655.
14. Oakley A, Strange V, Bonell C, Allen E, Stephenson J, Team RS: Process evaluation in randomised controlled trials of complex interventions. *BMJ* 2006, 332(7538):413-416.
15. Dobson D, Cook TJ: Avoiding type III error in program evaluation. *Eval Program Plann* 1980, 3(4):269-276.
16. Bradley F, Wiles R, Kinmonth AL, Mant D, Gantley M: Development and evaluation of complex interventions in health services research: case study of the Southampton heart integrated care project (SHIP). 1999, 318(7185):711-715.
17. Linnan; L, Steckler A: An Overview. In: *Process Evaluation for Public Health Interventions and Research*. edn. Edited by Linnan; L, Steckler A. San Francisco, CA: Jossey-Bass; 2002.
18. Mayring P: Qualitative Inhaltsanalyse. Grundlagen und Techniken, vol. 11. Weinheim, Basel: Beltz; 2016.
19. Damschroder LJ, Aron DC, Keith RE, Kirsh SR, Alexander JA, Lowery JC: Fostering implementation of health services research findings into practice: a consolidated framework for advancing implementation science. *Implementation Science* 2009, 4(1):50.
20. Salisbury C, Sampson F, Ridd M, Montgomery AA: How should continuity of care in primary health care be assessed? *The British journal of general practice : the journal of the Royal College of General Practitioners* 2009, 59(561):e134-e141.
21. Gardner K, Banfield M, McRae I, Gillespie J, Yen L: Improving coordination through information continuity: a framework for translational research. *BMC Health Serv Res* 2014, 14:590-590.
22. Huntley A, Lasserson D, Wye L, Morris R, Checkland K, England H, Salisbury C, Purdy S: Which features of primary care affect unscheduled secondary care use? A systematic review. *BMJ Open* 2014, 4(5):e004746.

## Figure Legends



Figure 1: **Logic model of the working mechanisms in the VESPEERA programme**

For peer review only

1  
2  
3  
4  
5  
6  
7  
8  
9  
10  
11  
12  
13  
14  
15  
16  
17  
18  
19  
20  
21  
22  
23  
24  
25  
26  
27  
28  
29  
30  
31  
32  
33  
34  
35  
36  
37  
38  
39  
40  
41  
42  
43  
44  
45  
46  
47  
48  
49  
50  
51  
52  
53  
54  
55  
56  
57  
58  
59  
60

1  
2  
3  
4  
5  
6  
7  
8  
9  
10  
11  
12  
13  
14  
15  
16  
17  
18  
19  
20  
21  
22  
23  
24  
25  
26  
27  
28  
29  
30  
31  
32  
33  
34  
35  
36  
37  
38  
39  
40  
41  
42  
43  
44  
45  
46  
47  
48  
49  
50  
51  
52  
53  
54  
55  
56  
57  
58  
59  
60

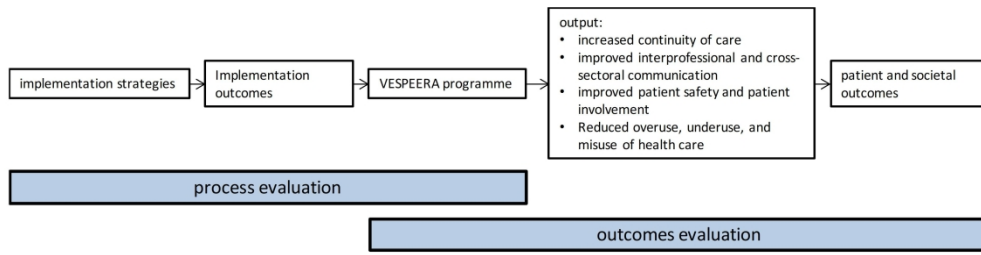

Figure 1: Logic model of the working mechanisms in the VESPEERA programme

1016x254mm (96 x 96 DPI)

| Research Question                                                                                           | Outcomes / Indicators                                                                                                       | Data sources |
|-------------------------------------------------------------------------------------------------------------|-----------------------------------------------------------------------------------------------------------------------------|--------------|
| 1. REACH AND INTERVENTION FIDELITY                                                                          | Proportion and description of patients who participated in VESPEERA                                                         | patient data |
| a) Was the intervention implemented as planned (“intervention fidelity”) in targeted populations (“reach”)? | compared to all targeted persons who meet the inclusion criteria                                                            |              |
| b) To what extent have the planned components been offered to care providers and patients?                  | Proportion of persons enrolled in the general practitioner centered-care programme (HZV) who                                | patient data |
| c) To what extent have these been utilised by care providers and patients?                                  | -have been admitted to a participating hospital by a participating practice,                                                |              |
| d) What was the adherence concerning the recommended practices of hospital admission and discharge.         | -for whom a new patient account has been created in the Care Cockpit and                                                    |              |
| e) Has the targeted patient population been reached?                                                        | -for whom a complete admission letter including a medication plan was generated and was given to the patient to take along, |              |
|                                                                                                             | compared to all participating HZV-insured persons in participating practices with planned hospital admissions               |              |
|                                                                                                             | Proportion of participating patients who                                                                                    | patient data |
|                                                                                                             | -have been discharged from a participating hospital to their GP                                                             |              |
|                                                                                                             | -for whom at the time of discharge the HOSPITAL Score has been determined                                                   |              |
|                                                                                                             | compared to all participating patients who have been discharged from a participating hospital                               |              |

|                                                                                                                                                                                                                                                        |                                                                                                                                                                                                                                                                                                  |                                                                                                                                  |
|--------------------------------------------------------------------------------------------------------------------------------------------------------------------------------------------------------------------------------------------------------|--------------------------------------------------------------------------------------------------------------------------------------------------------------------------------------------------------------------------------------------------------------------------------------------------|----------------------------------------------------------------------------------------------------------------------------------|
|                                                                                                                                                                                                                                                        | Proportion of participating patients for whom the assessment for planning of follow-up care has been conducted compared to all participating patients                                                                                                                                            | patient data                                                                                                                     |
|                                                                                                                                                                                                                                                        | Proportion of participating patients who have been enrolled in the follow-up telephone monitoring due to an intermediate or high risk for rehospitalisation and for whom at least two phone calls have been conducted within the given timeframe of three months, per all participating patients | patient data                                                                                                                     |
|                                                                                                                                                                                                                                                        | The degree to which the intervention components in hospitals have been implemented and offered as compared to the intention                                                                                                                                                                      | Hospital process data survey;<br>Hospital Implementation plans;<br>Questionnaires: staff from participating hospitals            |
| <p>2. PERCEIVED EFFECTS</p> <p>Which results, from the view point of care providers and patients, were:</p> <p>a) Achieved as intended?</p> <p>b) Not achieved although intended?</p> <p>c) Achieved although not intended (positive or negative)?</p> | <p>Open-ended question</p> <p>As support:</p> <p>a) and b): name outcomes of the outcome evaluation</p> <p>c): name domains of possible results</p>                                                                                                                                              | <p>interviews: all participating care providers*, patients</p> <p>Questionnaires: all participating care providers, patients</p> |

|                                                                                                                                                                                                                                                      |                                                                                                                                                                                                                                                                                                                                                                                                  |                                                                                                             |
|------------------------------------------------------------------------------------------------------------------------------------------------------------------------------------------------------------------------------------------------------|--------------------------------------------------------------------------------------------------------------------------------------------------------------------------------------------------------------------------------------------------------------------------------------------------------------------------------------------------------------------------------------------------|-------------------------------------------------------------------------------------------------------------|
|                                                                                                                                                                                                                                                      |                                                                                                                                                                                                                                                                                                                                                                                                  |                                                                                                             |
| <p>3. WORKING MECHANISMS</p> <p>Which components and aspects of the intervention programme contributed to achieving the results from the view point of care providers?</p>                                                                           | <p>open-ended question</p> <p>as support:</p> <p>name intervention components (4-8 max., only those concerning the person being interviewed)</p>                                                                                                                                                                                                                                                 | <p>interviews: all participating care providers</p> <p>Questionnaires: all participating care providers</p> |
| <p>4. FEASIBILITY</p> <p>What were acceptability and attractiveness of the programme from the point of view of care providers?</p>                                                                                                                   | <p>Open-ended questions</p>                                                                                                                                                                                                                                                                                                                                                                      | <p>interviews: all participating care providers</p> <p>Questionnaires: all participating care providers</p> |
| <p>5. CONTEXTUAL FACTORS</p> <p>a) What are determinants for implementing the program?</p> <p>b) Which contextual factors on system, hospital and practice level influenced the adoption of intervention components and outcomes of the program?</p> | <p>Open-ended question in interviews, structured questions in questionnaires</p> <p>As support:</p> <p>a): name domains, especially concerning behavioral factors (such as knowledge, attitude, self-efficacy, routine, desire/ will, skills/ capability; using the CFIR[18]</p> <p>b): name domains of contextual factors using frameworks (to be chosen when designing the questionnaires)</p> | <p>interviews: all participating care providers</p> <p>Questionnaires: all participating care providers</p> |

1  
2  
3  
4  
5  
6  
7  
8  
9  
10  
11  
12  
13  
14  
15  
16  
17  
18  
19  
20  
21  
22  
23  
24  
25  
26  
27  
28  
29  
30  
31  
32  
33  
34  
35  
36  
37  
38  
39  
40  
41  
42  
43  
44  
45  
46

|                                                                                                                                                                                                                                                                                   |                                                                                                          |                                                                                                   |
|-----------------------------------------------------------------------------------------------------------------------------------------------------------------------------------------------------------------------------------------------------------------------------------|----------------------------------------------------------------------------------------------------------|---------------------------------------------------------------------------------------------------|
| <p>c) Which practices concerning admission and discharge management have been implemented in non-participating hospitals during the intervention period (for example in consequence of the new regulation on hospital discharge management as described in the introduction)?</p> | <p>c) :Open-ended question<br/>As support:<br/>Name components of admission and discharge management</p> | <p>interviews: non-participating hospitals, management staff from non-participating hospitals</p> |
| <p>6. DOSE-RESPONSE ASSOCIATIONS<br/>Which associations exist between the outcomes (as disclosed by the outcomes evaluation) and findings of the process evaluation?</p>                                                                                                          |                                                                                                          | <p>patient data</p>                                                                               |

\* care providers include all staff from participating and non-participating hospitals and general practices as described in the 'eligibility criteria' section

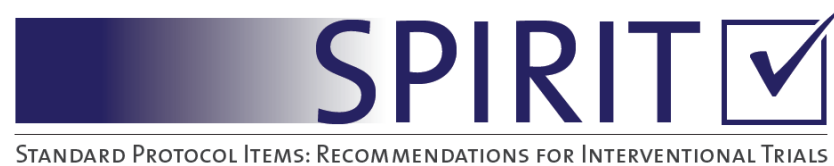

SPIRIT 2013 Checklist: Recommended items to address in a clinical trial protocol and related documents\*

| Section/item                      | Item No | Description                                                                                                                                                                                                                                                                              | Addressed on page number |
|-----------------------------------|---------|------------------------------------------------------------------------------------------------------------------------------------------------------------------------------------------------------------------------------------------------------------------------------------------|--------------------------|
| <b>Administrative information</b> |         |                                                                                                                                                                                                                                                                                          |                          |
| Title                             | 1       | Descriptive title identifying the study design, population, interventions, and, if applicable, trial acronym                                                                                                                                                                             | 1 (Title)                |
| Trial registration                | 2a      | Trial identifier and registry name. If not yet registered, name of intended registry                                                                                                                                                                                                     | 4 (Trial Registration)   |
|                                   | 2b      | All items from the World Health Organization Trial Registration Data Set                                                                                                                                                                                                                 | Additional files         |
| Protocol version                  | 3       | Date and version identifier                                                                                                                                                                                                                                                              | 24 (Trial Status)        |
| Funding                           | 4       | Sources and types of financial, material, and other support                                                                                                                                                                                                                              | 26 (Declarations)        |
| Roles and responsibilities        | 5a      | Names, affiliations, and roles of protocol contributors                                                                                                                                                                                                                                  | 1-2, 26 (Declarations)   |
|                                   | 5b      | Name and contact information for the trial sponsor                                                                                                                                                                                                                                       | 26 (Declarations)        |
|                                   | 5c      | Role of study sponsor and funders, if any, in study design; collection, management, analysis, and interpretation of data; writing of the report; and the decision to submit the report for publication, including whether they will have ultimate authority over any of these activities | 26 (Declarations)        |

1  
2  
3  
4  
5  
6  
7  
8  
9  
10  
11  
12  
13  
14  
15  
16  
17  
18  
19  
20  
21  
22  
23  
24  
25  
26  
27  
28  
29  
30  
31  
32  
33  
34  
35  
36  
37  
38  
39  
40  
41  
42  
43  
44  
45  
46

|    |                                                                                                                                                                                                                                                                  |                   |
|----|------------------------------------------------------------------------------------------------------------------------------------------------------------------------------------------------------------------------------------------------------------------|-------------------|
| 5d | Composition, roles, and responsibilities of the coordinating centre, steering committee, endpoint adjudication committee, data management team, and other individuals or groups overseeing the trial, if applicable (see Item 21a for data monitoring committee) | 26 (Declarations) |
|----|------------------------------------------------------------------------------------------------------------------------------------------------------------------------------------------------------------------------------------------------------------------|-------------------|

**Introduction**

|                          |    |                                                                                                                                                                                                    |                                                       |
|--------------------------|----|----------------------------------------------------------------------------------------------------------------------------------------------------------------------------------------------------|-------------------------------------------------------|
| Background and rationale | 6a | Description of research question and justification for undertaking the trial, including summary of relevant studies (published and unpublished) examining benefits and harms for each intervention | 5-6 (Background), 10-11 (VESPEERA process evaluation) |
|--------------------------|----|----------------------------------------------------------------------------------------------------------------------------------------------------------------------------------------------------|-------------------------------------------------------|

|    |                                       |      |
|----|---------------------------------------|------|
| 6b | Explanation for choice of comparators | n.a. |
|----|---------------------------------------|------|

|            |   |                                   |                 |
|------------|---|-----------------------------------|-----------------|
| Objectives | 7 | Specific objectives or hypotheses | 11 (Objectives) |
|------------|---|-----------------------------------|-----------------|

|              |   |                                                                                                                                                                                                           |              |
|--------------|---|-----------------------------------------------------------------------------------------------------------------------------------------------------------------------------------------------------------|--------------|
| Trial design | 8 | Description of trial design including type of trial (eg, parallel group, crossover, factorial, single group), allocation ratio, and framework (eg, superiority, equivalence, noninferiority, exploratory) | 16 (Methods) |
|--------------|---|-----------------------------------------------------------------------------------------------------------------------------------------------------------------------------------------------------------|--------------|

**Methods: Participants, interventions, and outcomes**

|               |   |                                                                                                                                                                                    |                    |
|---------------|---|------------------------------------------------------------------------------------------------------------------------------------------------------------------------------------|--------------------|
| Study setting | 9 | Description of study settings (eg, community clinic, academic hospital) and list of countries where data will be collected. Reference to where list of study sites can be obtained | 10 (Study setting) |
|---------------|---|------------------------------------------------------------------------------------------------------------------------------------------------------------------------------------|--------------------|

|                      |    |                                                                                                                                                                                              |                                             |
|----------------------|----|----------------------------------------------------------------------------------------------------------------------------------------------------------------------------------------------|---------------------------------------------|
| Eligibility criteria | 10 | Inclusion and exclusion criteria for participants. If applicable, eligibility criteria for study centres and individuals who will perform the interventions (eg, surgeons, psychotherapists) | 16-17 (Study setting/ eligibility criteria) |
|----------------------|----|----------------------------------------------------------------------------------------------------------------------------------------------------------------------------------------------|---------------------------------------------|

|               |     |                                                                                                                            |      |
|---------------|-----|----------------------------------------------------------------------------------------------------------------------------|------|
| Interventions | 11a | Interventions for each group with sufficient detail to allow replication, including how and when they will be administered | n.a. |
|---------------|-----|----------------------------------------------------------------------------------------------------------------------------|------|

|     |                                                                                                                                                                                                |      |
|-----|------------------------------------------------------------------------------------------------------------------------------------------------------------------------------------------------|------|
| 11b | Criteria for discontinuing or modifying allocated interventions for a given trial participant (eg, drug dose change in response to harms, participant request, or improving/worsening disease) | n.a. |
|-----|------------------------------------------------------------------------------------------------------------------------------------------------------------------------------------------------|------|



|    |                      |     |                                                                                                                                                                                                                                                                                                                                                                                |                     |
|----|----------------------|-----|--------------------------------------------------------------------------------------------------------------------------------------------------------------------------------------------------------------------------------------------------------------------------------------------------------------------------------------------------------------------------------|---------------------|
| 1  |                      | 11c | Strategies to improve adherence to intervention protocols, and any procedures for monitoring adherence (eg, drug tablet return, laboratory tests)                                                                                                                                                                                                                              | n.a.                |
| 2  |                      |     |                                                                                                                                                                                                                                                                                                                                                                                |                     |
| 3  |                      |     |                                                                                                                                                                                                                                                                                                                                                                                |                     |
| 4  |                      | 11d | Relevant concomitant care and interventions that are permitted or prohibited during the trial                                                                                                                                                                                                                                                                                  | n.a.                |
| 5  |                      |     |                                                                                                                                                                                                                                                                                                                                                                                |                     |
| 6  | Outcomes             | 12  | Primary, secondary, and other outcomes, including the specific measurement variable (eg, systolic blood pressure), analysis metric (eg, change from baseline, final value, time to event), method of aggregation (eg, median, proportion), and time point for each outcome. Explanation of the clinical relevance of chosen efficacy and harm outcomes is strongly recommended | 12-15 (Table 2)     |
| 7  |                      |     |                                                                                                                                                                                                                                                                                                                                                                                |                     |
| 8  |                      |     |                                                                                                                                                                                                                                                                                                                                                                                |                     |
| 9  |                      |     |                                                                                                                                                                                                                                                                                                                                                                                |                     |
| 10 |                      |     |                                                                                                                                                                                                                                                                                                                                                                                |                     |
| 11 | Participant timeline | 13  | Time schedule of enrolment, interventions (including any run-ins and washouts), assessments, and visits for participants. A schematic diagram is highly recommended (see Figure)                                                                                                                                                                                               | 16 (Study design)   |
| 12 |                      |     |                                                                                                                                                                                                                                                                                                                                                                                |                     |
| 13 |                      |     |                                                                                                                                                                                                                                                                                                                                                                                |                     |
| 14 |                      |     |                                                                                                                                                                                                                                                                                                                                                                                |                     |
| 15 | Sample size          | 14  | Estimated number of participants needed to achieve study objectives and how it was determined, including clinical and statistical assumptions supporting any sample size calculations                                                                                                                                                                                          | 19-20 (Sample Size) |
| 16 |                      |     |                                                                                                                                                                                                                                                                                                                                                                                |                     |
| 17 |                      |     |                                                                                                                                                                                                                                                                                                                                                                                |                     |
| 18 | Recruitment          | 15  | 20-21                                                                                                                                                                                                                                                                                                                                                                          | 16-17(Recruitment)  |
| 19 |                      |     |                                                                                                                                                                                                                                                                                                                                                                                |                     |
| 20 |                      |     |                                                                                                                                                                                                                                                                                                                                                                                |                     |
| 21 |                      |     |                                                                                                                                                                                                                                                                                                                                                                                |                     |

## Methods: Assignment of interventions (for controlled trials)

### Allocation:

|    |                                  |     |                                                                                                                                                                                                                                                                                                                                                          |      |
|----|----------------------------------|-----|----------------------------------------------------------------------------------------------------------------------------------------------------------------------------------------------------------------------------------------------------------------------------------------------------------------------------------------------------------|------|
| 25 |                                  |     |                                                                                                                                                                                                                                                                                                                                                          |      |
| 26 | Sequence generation              | 16a | Method of generating the allocation sequence (eg, computer-generated random numbers), and list of any factors for stratification. To reduce predictability of a random sequence, details of any planned restriction (eg, blocking) should be provided in a separate document that is unavailable to those who enrol participants or assign interventions | n.a. |
| 27 |                                  |     |                                                                                                                                                                                                                                                                                                                                                          |      |
| 28 |                                  |     |                                                                                                                                                                                                                                                                                                                                                          |      |
| 29 |                                  |     |                                                                                                                                                                                                                                                                                                                                                          |      |
| 30 |                                  |     |                                                                                                                                                                                                                                                                                                                                                          |      |
| 31 | Allocation concealment mechanism | 16b | Mechanism of implementing the allocation sequence (eg, central telephone; sequentially numbered, opaque, sealed envelopes), describing any steps to conceal the sequence until interventions are assigned                                                                                                                                                | n.a. |
| 32 |                                  |     |                                                                                                                                                                                                                                                                                                                                                          |      |
| 33 |                                  |     |                                                                                                                                                                                                                                                                                                                                                          |      |
| 34 |                                  |     |                                                                                                                                                                                                                                                                                                                                                          |      |
| 35 |                                  |     |                                                                                                                                                                                                                                                                                                                                                          |      |
| 36 | Implementation                   | 16c | Who will generate the allocation sequence, who will enrol participants, and who will assign participants to interventions                                                                                                                                                                                                                                | n.a. |
| 37 |                                  |     |                                                                                                                                                                                                                                                                                                                                                          |      |
| 38 |                                  |     |                                                                                                                                                                                                                                                                                                                                                          |      |
| 39 | Blinding (masking)               | 17a | Who will be blinded after assignment to interventions (eg, trial participants, care providers, outcome assessors, data analysts), and how                                                                                                                                                                                                                | n.a. |
| 40 |                                  |     |                                                                                                                                                                                                                                                                                                                                                          |      |
| 41 |                                  |     |                                                                                                                                                                                                                                                                                                                                                          |      |
| 42 |                                  |     |                                                                                                                                                                                                                                                                                                                                                          |      |

1 17b If blinded, circumstances under which unblinding is permissible, and procedure for revealing a participant's n.a.  
2 allocated intervention during the trial  
3

4 **Methods: Data collection, management, and analysis**

5  
6  
7 Data collection 18a Plans for assessment and collection of outcome, baseline, and other trial data, including any related 21-22 (Data  
8 methods processes to promote data quality (eg, duplicate measurements, training of assessors) and a description of collection and  
9 study instruments (eg, questionnaires, laboratory tests) along with their reliability and validity, if known. management)  
10 Reference to where data collection forms can be found, if not in the protocol  
11  
12 18b Plans to promote participant retention and complete follow-up, including list of any outcome data to be \_\_\_\_\_  
13 collected for participants who discontinue or deviate from intervention protocols  
14  
15 Data management 19 Plans for data entry, coding, security, and storage, including any related processes to promote data quality 21-22(Data  
16 (eg, double data entry; range checks for data values). Reference to where details of data management collection and  
17 procedures can be found, if not in the protocol management)  
18  
19  
20 Statistical methods 20a Statistical methods for analysing primary and secondary outcomes. Reference to where other details of the 22(Data Analysis)  
21 statistical analysis plan can be found, if not in the protocol  
22  
23 20b Methods for any additional analyses (eg, subgroup and adjusted analyses) 22 (Data Analysis)  
24  
25 20c Definition of analysis population relating to protocol non-adherence (eg, as randomised analysis), and any n.a.  
26 statistical methods to handle missing data (eg, multiple imputation)  
27  
28

29 **Methods: Monitoring**

30  
31 Data monitoring 21a Composition of data monitoring committee (DMC); summary of its role and reporting structure; statement of n.a.  
32 whether it is independent from the sponsor and competing interests; and reference to where further details  
33 about its charter can be found, if not in the protocol. Alternatively, an explanation of why a DMC is not  
34 needed  
35  
36  
37 21b Description of any interim analyses and stopping guidelines, including who will have access to these interim n.a.  
38 results and make the final decision to terminate the trial  
39  
40 Harms 22 Plans for collecting, assessing, reporting, and managing solicited and spontaneously reported adverse n.a.  
41 events and other unintended effects of trial interventions or trial conduct  
42  
43

|    |                                 |     |                                                                                                                                                                                                                                                                                     |                                                |
|----|---------------------------------|-----|-------------------------------------------------------------------------------------------------------------------------------------------------------------------------------------------------------------------------------------------------------------------------------------|------------------------------------------------|
| 1  | Auditing                        | 23  | Frequency and procedures for auditing trial conduct, if any, and whether the process will be independent from investigators and the sponsor                                                                                                                                         | n.a.                                           |
| 2  |                                 |     |                                                                                                                                                                                                                                                                                     |                                                |
| 3  |                                 |     |                                                                                                                                                                                                                                                                                     |                                                |
| 4  | <b>Ethics and dissemination</b> |     |                                                                                                                                                                                                                                                                                     |                                                |
| 5  |                                 |     |                                                                                                                                                                                                                                                                                     |                                                |
| 6  | Research ethics approval        | 24  | Plans for seeking research ethics committee/institutional review board (REC/IRB) approval                                                                                                                                                                                           | 24 (Ethics, data protection and dissemination) |
| 7  |                                 |     |                                                                                                                                                                                                                                                                                     |                                                |
| 8  |                                 |     |                                                                                                                                                                                                                                                                                     |                                                |
| 9  |                                 |     |                                                                                                                                                                                                                                                                                     |                                                |
| 10 |                                 |     |                                                                                                                                                                                                                                                                                     |                                                |
| 11 | Protocol amendments             | 25  | Plans for communicating important protocol modifications (eg, changes to eligibility criteria, outcomes, analyses) to relevant parties (eg, investigators, REC/IRBs, trial participants, trial registries, journals, regulators)                                                    | n.a.                                           |
| 12 |                                 |     |                                                                                                                                                                                                                                                                                     |                                                |
| 13 |                                 |     |                                                                                                                                                                                                                                                                                     |                                                |
| 14 |                                 |     |                                                                                                                                                                                                                                                                                     |                                                |
| 15 | Consent or assent               | 26a | Who will obtain informed consent or assent from potential trial participants or authorised surrogates, and how (see Item 32)                                                                                                                                                        | 16-17(Recruitment)                             |
| 16 |                                 |     |                                                                                                                                                                                                                                                                                     |                                                |
| 17 |                                 |     |                                                                                                                                                                                                                                                                                     |                                                |
| 18 |                                 | 26b | Additional consent provisions for collection and use of participant data and biological specimens in ancillary studies, if applicable                                                                                                                                               | n.a.                                           |
| 19 |                                 |     |                                                                                                                                                                                                                                                                                     |                                                |
| 20 |                                 |     |                                                                                                                                                                                                                                                                                     |                                                |
| 21 |                                 |     |                                                                                                                                                                                                                                                                                     |                                                |
| 22 | Confidentiality                 | 27  | How personal information about potential and enrolled participants will be collected, shared, and maintained in order to protect confidentiality before, during, and after the trial                                                                                                | 21-22(Data collection and management)          |
| 23 |                                 |     |                                                                                                                                                                                                                                                                                     |                                                |
| 24 |                                 |     |                                                                                                                                                                                                                                                                                     |                                                |
| 25 |                                 |     |                                                                                                                                                                                                                                                                                     |                                                |
| 26 | Declaration of interests        | 28  | Financial and other competing interests for principal investigators for the overall trial and each study site                                                                                                                                                                       | 26 (Declarations)                              |
| 27 |                                 |     |                                                                                                                                                                                                                                                                                     |                                                |
| 28 |                                 |     |                                                                                                                                                                                                                                                                                     |                                                |
| 29 | Access to data                  | 29  | Statement of who will have access to the final trial dataset, and disclosure of contractual agreements that limit such access for investigators                                                                                                                                     | 21-22 (Data collection and management)         |
| 30 |                                 |     |                                                                                                                                                                                                                                                                                     |                                                |
| 31 |                                 |     |                                                                                                                                                                                                                                                                                     |                                                |
| 32 |                                 |     |                                                                                                                                                                                                                                                                                     |                                                |
| 33 |                                 |     |                                                                                                                                                                                                                                                                                     |                                                |
| 34 | Ancillary and post-trial care   | 30  | Provisions, if any, for ancillary and post-trial care, and for compensation to those who suffer harm from trial participation                                                                                                                                                       | n.a.                                           |
| 35 |                                 |     |                                                                                                                                                                                                                                                                                     |                                                |
| 36 |                                 |     |                                                                                                                                                                                                                                                                                     |                                                |
| 37 | Dissemination policy            | 31a | Plans for investigators and sponsor to communicate trial results to participants, healthcare professionals, the public, and other relevant groups (eg, via publication, reporting in results databases, or other data sharing arrangements), including any publication restrictions | 24 (Ethics, data protection and dissemination) |
| 38 |                                 |     |                                                                                                                                                                                                                                                                                     |                                                |
| 39 |                                 |     |                                                                                                                                                                                                                                                                                     |                                                |
| 40 |                                 |     |                                                                                                                                                                                                                                                                                     |                                                |
| 41 |                                 |     |                                                                                                                                                                                                                                                                                     |                                                |
| 42 |                                 |     |                                                                                                                                                                                                                                                                                     |                                                |
| 43 |                                 |     |                                                                                                                                                                                                                                                                                     |                                                |
| 44 |                                 |     |                                                                                                                                                                                                                                                                                     |                                                |
| 45 |                                 |     |                                                                                                                                                                                                                                                                                     |                                                |
| 46 |                                 |     |                                                                                                                                                                                                                                                                                     |                                                |

1  
2  
3  
4  
5  
6  
7  
8  
9  
10  
11  
12  
13  
14  
15  
16  
17  
18  
19  
20  
21  
22  
23  
24  
25  
26  
27  
28  
29  
30  
31  
32  
33  
34  
35  
36  
37  
38  
39  
40  
41  
42  
43  
44  
45  
46

|                            |                                                                                                                                                                                                   |      |
|----------------------------|---------------------------------------------------------------------------------------------------------------------------------------------------------------------------------------------------|------|
| 31b                        | Authorship eligibility guidelines and any intended use of professional writers                                                                                                                    | n.a. |
| 31c                        | Plans, if any, for granting public access to the full protocol, participant-level dataset, and statistical code                                                                                   | n.a. |
| <b>Appendices</b>          |                                                                                                                                                                                                   |      |
| Informed consent materials | 32 Model consent form and other related documentation given to participants and authorised surrogates                                                                                             | -    |
| Biological specimens       | 33 Plans for collection, laboratory evaluation, and storage of biological specimens for genetic or molecular analysis in the current trial and for future use in ancillary studies, if applicable | n.a. |

---

\*It is strongly recommended that this checklist be read in conjunction with the SPIRIT 2013 Explanation & Elaboration for important clarification on the items. Amendments to the protocol should be tracked and dated. The SPIRIT checklist is copyrighted by the SPIRIT Group under the Creative Commons "[Attribution-NonCommercial-NoDerivs 3.0 Unported](https://creativecommons.org/licenses/by-nc-nd/3.0/)" license.
