# Supplementary material for: Improving continuity of patient care across sectors: study protocol of the process evaluation of a quasi-experimental multi-centre study regarding an admission and discharge model in Germany (VESPEERA)
Source: PubMed Central journal article supplement — BMJ Open. 2019 Nov 12;9(11):e031245. doi: 10.1136/bmjopen-2019-031245 (PMC6858220; doi:10.1136/bmjopen-2019-031245), 2019-11-12
Supplement: bmjopen-2019-031245supp001.pdf [file bmjopen-2019-031245supp001.pdf]

| Research Question                                                                                           | Outcomes / Indicators                                                                                                                                                                                                                                                                     | Data sources |
|-------------------------------------------------------------------------------------------------------------|-------------------------------------------------------------------------------------------------------------------------------------------------------------------------------------------------------------------------------------------------------------------------------------------|--------------|
| 1. REACH AND INTERVENTION FIDELITY                                                                          | Proportion and description of patients who participated in VESPEERA compared to all targeted persons who meet the inclusion criteria                                                                                                                                                      | patient data |
| a) Was the intervention implemented as planned (“intervention fidelity”) in targeted populations (“reach”)? | Proportion of persons enrolled in the general practitioner centered-care programme (HZV) who                                                                                                                                                                                              | patient data |
| b) To what extent have the planned components been offered to care providers and patients?                  | -have been admitted to a participating hospital by a participating practice,                                                                                                                                                                                                              |              |
| c) To what extent have these been utilised by care providers and patients?                                  | -for whom a new patient account has been created in the Care Cockpit and<br>-for whom a complete admission letter including a medication plan was generated and was given to the patient to take along,                                                                                   |              |
| d) What was the adherence concerning the recommended practices of hospital admission and discharge.         | compared to all participating HZV-insured persons in participating practices with planned hospital admissions                                                                                                                                                                             |              |
| e) Has the targeted patient population been reached?                                                        | Proportion of participating patients who<br>-have been discharged from a participating hospital to their GP<br>-for whom at the time of discharge the HOSPITAL Score has been determined<br>compared to all participating patients who have been discharged from a participating hospital | patient data |

|                                                                                                                                                                                                                                                 |                                                                                                                                                                                                                                                                                                  |                                                                                                                           |
|-------------------------------------------------------------------------------------------------------------------------------------------------------------------------------------------------------------------------------------------------|--------------------------------------------------------------------------------------------------------------------------------------------------------------------------------------------------------------------------------------------------------------------------------------------------|---------------------------------------------------------------------------------------------------------------------------|
|                                                                                                                                                                                                                                                 | Proportion of participating patients for whom the assessment for planning of follow-up care has been conducted compared to all participating patients                                                                                                                                            | patient data                                                                                                              |
|                                                                                                                                                                                                                                                 | Proportion of participating patients who have been enrolled in the follow-up telephone monitoring due to an intermediate or high risk for rehospitalisation and for whom at least two phone calls have been conducted within the given timeframe of three months, per all participating patients | patient data                                                                                                              |
|                                                                                                                                                                                                                                                 | The degree to which the intervention components in hospitals have been implemented and offered as compared to the intention                                                                                                                                                                      | Hospital process data survey;<br>Hospital Implementation plans;<br>Questionnaires: staff from participating hospitals     |
| 2. PERCEIVED EFFECTS<br><br>Which results, from the view point of care providers and patients, were:<br><br>a) Achieved as intended?<br><br>b) Not achieved although intended?<br><br>c) Achieved although not intended (positive or negative)? | Open-ended question<br><br>As support:<br><br>a) and b): name outcomes of the outcome evaluation<br><br>c): name domains of possible results                                                                                                                                                     | interviews: all participating care providers*, patients<br><br>Questionnaires: all participating care providers, patients |

|                                                                                                                                                                                                                                                      |                                                                                                                                                                                                                                                                                                                                                                                                  |                                                                                                             |
|------------------------------------------------------------------------------------------------------------------------------------------------------------------------------------------------------------------------------------------------------|--------------------------------------------------------------------------------------------------------------------------------------------------------------------------------------------------------------------------------------------------------------------------------------------------------------------------------------------------------------------------------------------------|-------------------------------------------------------------------------------------------------------------|
|                                                                                                                                                                                                                                                      |                                                                                                                                                                                                                                                                                                                                                                                                  |                                                                                                             |
| <p>3. WORKING MECHANISMS</p> <p>Which components and aspects of the intervention programme contributed to achieving the results from the view point of care providers?</p>                                                                           | <p>open-ended question</p> <p>as support:</p> <p>name intervention components (4-8 max., only those concerning the person being interviewed)</p>                                                                                                                                                                                                                                                 | <p>interviews: all participating care providers</p> <p>Questionnaires: all participating care providers</p> |
| <p>4. FEASIBILITY</p> <p>What were acceptability and attractiveness of the programme from the point of view of care providers?</p>                                                                                                                   | <p>Open-ended questions</p>                                                                                                                                                                                                                                                                                                                                                                      | <p>interviews: all participating care providers</p> <p>Questionnaires: all participating care providers</p> |
| <p>5. CONTEXTUAL FACTORS</p> <p>a) What are determinants for implementing the program?</p> <p>b) Which contextual factors on system, hospital and practice level influenced the adoption of intervention components and outcomes of the program?</p> | <p>Open-ended question in interviews, structured questions in questionnaires</p> <p>As support:</p> <p>a): name domains, especially concerning behavioral factors (such as knowledge, attitude, self-efficacy, routine, desire/ will, skills/ capability; using the CFIR[18]</p> <p>b): name domains of contextual factors using frameworks (to be chosen when designing the questionnaires)</p> | <p>interviews: all participating care providers</p> <p>Questionnaires: all participating care providers</p> |

|                                                                                                                                                                                                                                                                                   |                                                                                                                |                                                                                                   |
|-----------------------------------------------------------------------------------------------------------------------------------------------------------------------------------------------------------------------------------------------------------------------------------|----------------------------------------------------------------------------------------------------------------|---------------------------------------------------------------------------------------------------|
| <p>c) Which practices concerning admission and discharge management have been implemented in non-participating hospitals during the intervention period (for example in consequence of the new regulation on hospital discharge management as described in the introduction)?</p> | <p>c) :Open-ended question</p> <p>As support:</p> <p>Name components of admission and discharge management</p> | <p>interviews: non-participating hospitals, management staff from non-participating hospitals</p> |
| <p>6. DOSE-RESPONSE ASSOCIATIONS</p> <p>Which associations exist between the outcomes (as disclosed by the outcomes evaluation) and findings of the process evaluation?</p>                                                                                                       |                                                                                                                | <p>patient data</p>                                                                               |

\* care providers include all staff from participating and non-participating hospitals and general practices as described in the 'eligibility criteria' section
